# Supplementary material for: The All-Data-Based Evolutionary Hypothesis of Ciliated Protists with a Revised Classification of the Phylum Ciliophora (Eukaryota, Alveolata)
Source: Springer Nature journal article supplement (doi:10.1038/srep24874), 2016-04-29

1 The All-Data-Based Evolutionary Hypothesis of Ciliated Protists with a Revised  
2 Classification of the Phylum Ciliophora (Eukaryota, Alveolata)

3

4 Feng Gao <sup>a</sup>, Alan Warren <sup>b</sup>, Qianqian Zhang <sup>c</sup>, Jun Gong <sup>c</sup>, Miao Miao <sup>d</sup>, Ping Sun <sup>e</sup>,  
5 Dapeng Xu <sup>f</sup>, Jie Huang <sup>g</sup>, Zhenzhen Yi <sup>h,\*</sup> & Weibo Song <sup>a,\*</sup>

6

7 <sup>a</sup> Institute of Evolution & Marine Biodiversity, Ocean University of China, Qingdao,  
8 China; <sup>b</sup> Department of Life Sciences, Natural History Museum, London, UK; <sup>c</sup> Yantai  
9 Institute of Coastal Zone Research, Chinese Academy of Sciences, Yantai, China; <sup>d</sup>  
10 College of Life Sciences, University of Chinese Academy of Sciences, Beijing, China;  
11 <sup>e</sup> Key Laboratory of the Ministry of Education for Coastal and Wetland Ecosystem,  
12 Xiamen University, Xiamen, China; <sup>f</sup> State Key Laboratory of Marine Environmental  
13 Science, Institute of Marine Microbes and Ecospheres, Xiamen University, Xiamen,  
14 China; <sup>g</sup> Institute of Hydrobiology, Chinese Academy of Sciences, Wuhan, China; <sup>h</sup>  
15 School of Life Science, South China Normal University, Guangzhou, China.

16

17 Running Head: Phylogeny and evolution of Ciliophora

18 \* Address correspondence to Zhenzhen Yi, zyi@scnu.edu.cn; or Weibo Song,  
19 wsong@ouc.edu.cn

20

**Table S1.** List of species for which SSU rDNA, 5.8S rDNA, LSU rDNA, and alpha-tubulin were newly sequenced in the present work.

|    | Class         | Subclass | Order               | Family            | Species                       | Sample sites                                                                                               | SSU rDNA | ITS1-5.8S-ITS2 | LSU rDNA | a-tubulin |
|----|---------------|----------|---------------------|-------------------|-------------------------------|------------------------------------------------------------------------------------------------------------|----------|----------------|----------|-----------|
| 1  | COLPODEA      |          | Colpodida           | Colpodidae        | <i>Colpoda inflata</i>        | A freshwater pond within the campus of the South China Normal University, Guangzhou (23° 09'N, 113° 22' E) | KM222106 | KM222071       | KM222160 |           |
| 2  | HETEROTRICHEA |          | Heterotrichida      | Climacostomidae   | <i>Climacostomum virens</i>   | No. 2 Bathing Beach, Qingdao (36° 03' N, 120° 21' E)                                                       |          |                | KM222165 | KM221978  |
| 3  | HETEROTRICHEA |          | Heterotrichida      | Climacostomidae   | <i>Fabrea salina</i>          | Mariculture pond, Weifang (37°06'N, 119°30'')                                                              | KM222110 | KM222078       | KM222167 | KM222005  |
| 4  | HETEROTRICHEA |          | Heterotrichida      | Condylostomatidae | <i>Condylostoma magnum</i>    | Wanggezhuang mudflats, Qingdao (36° 17' N, 120° 39' E)                                                     | KM222108 | KM222076       | KM222163 | KM221981  |
| 5  | HETEROTRICHEA |          | Heterotrichida      | Folliculinidae    | <i>Folliculina simplex</i>    | Zhongyuan Dock, Qingdao (36° 03' N, 120° 19' E)                                                            |          | KM222079       | KM222168 | KM221977  |
| 6  | HETEROTRICHEA |          | Heterotrichida      | Peritromidae      | <i>Peritromus faurei</i>      | Estuary of Baisha River, Qingdao (36° 15' N, 120° 19' E)                                                   |          | KM222080       | KM222169 |           |
| 7  | HETEROTRICHEA |          | Heterotrichida      | Spirostomidae     | <i>Anigsteinia clarissima</i> | No. 1 Bathing Beach, Qingdao (36° 03' N, 120° 21' E)                                                       | KM222109 | KM222077       | KM222166 | KM221982  |
| 8  | HETEROTRICHEA |          | Heterotrichida      | Spirostomidae     | <i>Spirostomum sp.</i>        | A freshwater pond within the campus of the South China Normal University, Guangzhou (23° 09'N, 113° 22' E) |          | KM222081       | KM222170 | KM222008  |
| 9  | HETEROTRICHEA |          | Heterotrichida      | Stentoridae       | <i>Stentor sp.</i>            | Huguangyan scenic spot, Zhanjiang (21° 09' N, 110° 18' E)                                                  | KM222111 | KM222082       | KM222171 | KM222003  |
| 10 | KARYORELICTEA |          | Loxodida            | Loxodidae         | <i>Loxodes cf. striatus</i>   | Seagull Island, Guagnzhou (22° 59' N, 113° 32' E)                                                          | KM222107 | KM222075       | KM222162 |           |
| 11 | KARYORELICTEA |          | Loxodida            | Loxodidae         | <i>Remanella granulosa</i>    | Sculpture Park Bathing Beach, Qingdao (36° 05'N, 120° 27' E)                                               |          |                |          | KM221984  |
| 12 | KARYORELICTEA |          | Protoheterotrichida | Geleidae          | <i>Geleia sinica</i>          | No. 1 Bathing Beach, Qingdao (36° 03' N, 120° 21' E)                                                       |          | KM222074       | KM222161 |           |
| 13 | KARYORELICTEA |          | Protostomatida      | Kentrophoridae    | <i>Kentrophoros gracilis</i>  | No. 6 Bathing Beach, Qingdao (36° 03' N, 120° 19' E)                                                       |          |                |          | KM222029  |

|    |                   |             |                 |                    |                                  |                                                                                                            |          |          |          |          |
|----|-------------------|-------------|-----------------|--------------------|----------------------------------|------------------------------------------------------------------------------------------------------------|----------|----------|----------|----------|
| 77 | LICNOPHOREA       |             | Licnophorida    | Licnophoridae      | <i>Licnophora lyngbycola</i> cf. | Daya Bay, Guangzhou (22° 36'N, 114° 33' E)                                                                 | FJ876955 |          | KM222164 | KM222007 |
| 14 | LITOSTOMATEA      | Haptoria    | Haptorida       | Acropisthiidae     | <i>Chaenea</i> sp.               | Daya Bay, Guangzhou (22° 36'N, 114° 33' E)                                                                 |          | KM222059 | KM222153 |          |
| 15 | LITOSTOMATEA      | Haptoria    | Haptorida       | Helicoprordontidae | <i>Helicoprordon maximus</i>     | Sculpture Park Bathing Beach, Qingdao (36° 05'N, 120° 27' E)                                               | KM222102 | KM222061 | KM222154 | KM221989 |
| 16 | LITOSTOMATEA      | Haptoria    | Haptorida       | Tracheliidae       | <i>Dileptus</i> sp.              | A freshwater pond within the campus of the South China Normal University, Guangzhou (23° 09'N, 113° 22' E) | KM222100 |          | KM222152 | KM221975 |
| 17 | LITOSTOMATEA      | Haptoria    | Pleurostomatida | Amphileptidae      | <i>Amphileptus songi</i>         | Circulating water system of a fish culture, Qingdao (36° 04'N, 120° 21' E)                                 | FJ876974 | KM222058 |          |          |
| 18 | MESODINIEA        |             | Mesodiniida     | Mesodiniidae       | <i>Mesodinium acarus</i>         | Wanggezhuang mudflats, Qingdao (36° 17' N, 120° 39' E)                                                     | KM222101 |          |          |          |
| 19 | NASSOPHOREA       |             | Discotrichida   | Discotrichidae     | <i>Discotricha papillifera</i>   | Stone man bathing beach, Qingdao (36° 06' N, 120° 29' E)                                                   |          | KM222067 |          |          |
| 20 | NASSOPHOREA       |             | Nassulida       | Furgasoniidae      | <i>Parafurgasonia</i> sp.        | 上海 A freshwater pond in Changfeng Park, Shanghai, China (31° 14' N, 121° 24' E).                           |          | KM222070 | KM222159 |          |
| 21 | NASSOPHOREA       |             | Nassulida       | Nassulidae         | <i>Nassula labiata</i>           | Daya Bay, Guangzhou (22° 36'N, 114° 33' E)                                                                 |          | KM222069 |          |          |
| 22 | OLIGOHYMENOPHOREA | Peniculia   | Paranassulida   | Paranassulidae     | <i>Paranassula</i> sp.           | Daya Bay, Guangzhou (22° 36'N, 114° 33' E)                                                                 |          | KM222068 |          |          |
| 23 | OLIGOHYMENOPHOREA | Peniculia   | Peniculida      | Frontoniidae       | <i>Frontonia canadensis</i>      | Huguangyan scenic spot, Zhanjiang (21° 09' N, 110° 18' E)                                                  | KM222112 | KM222083 | KM222172 | KM222002 |
| 24 | OLIGOHYMENOPHOREA | Peniculia   | Peniculida      | Lembadionidae      | <i>Lembadion</i> sp.             | Huguangyan scenic spot, Zhanjiang (21° 09' N, 110° 18' E)                                                  | KM222113 | KM222084 | KM222173 |          |
| 25 | OLIGOHYMENOPHOREA | Peritrichia | Sessilida       | Epistylididae      | <i>Epistylis</i> sp.             | Mangrove Reserve, Shenzhen (22° 32'N, 114° 00' E)                                                          | KM222114 | KM222085 | KM222174 | KM222025 |
| 26 | OLIGOHYMENOPHOREA | Peritrichia | Sessilida       | Epistylididae      | <i>Pseudepistylis songi</i>      | Nan'ao Island, Shantou (23° 28'N, 117° 06' E)                                                              | KM222115 | KM222086 | KM222175 | KM222023 |
| 27 | OLIGOHYMENOPHOREA | Peritrichia | Sessilida       | Opisthonectidae    | <i>Opisthonecta</i> sp.          | Mangrove Reserve, Shenzhen (22° 32'N, 114° 00' E)                                                          | KM222119 | KM222090 | KM222179 | KM222024 |

|    |                   |                 |                |                     |                                        |                                                                                       |          |          |          |          |
|----|-------------------|-----------------|----------------|---------------------|----------------------------------------|---------------------------------------------------------------------------------------|----------|----------|----------|----------|
| 28 | OLIGOHYMENOPHOREA | Peritrichia     | Sessilida      | Vorticellidae       | <i>Pseudovorticella shii</i>           | Donghai Island, Zhanjiang (21°05'N, 110°32' E)                                        | KM222116 | KM222087 | KM222176 | KM222020 |
| 29 | OLIGOHYMENOPHOREA | Peritrichia     | Sessilida      | Vorticellidae       | <i>Vorticella chiangi</i>              | Daya Bay, Guangzhou (22° 36'N, 114° 33' E)                                            | KM222117 | KM222088 | KM222177 | KM222021 |
| 30 | OLIGOHYMENOPHOREA | Peritrichia     | Sessilida      | Zoothamniidae       | <i>Zoothamnium hentscheli</i>          | Mipu Reserve, Hongkong (22° 30'N, 114° 04' E)                                         | KM222118 | KM222089 | KM222178 | KM222022 |
| 31 | OLIGOHYMENOPHOREA | Peritrichia     | Sessilida      | Zoothamniidae       | <i>Zoothamnopsis sinica</i>            | Seawater along the coast of Yellow Sea, Qingdao (36° 03' N, 120° 22' E)               |          |          |          | KM222031 |
| 32 | OLIGOHYMENOPHOREA | Scuticociliatia | Loxoccephalida | Cinetochilidae      | <i>Cinetochilum ovale</i>              | A port in Qingdao (36° 05' N, 120° 19' E)                                             |          |          |          | KM221956 |
| 33 | OLIGOHYMENOPHOREA | Scuticociliatia | Loxoccephalida | Cinetochilidae      | <i>Pseudoplatynematum denticulatum</i> | No. 1 Bathing Beach, Qingdao (36° 03' N, 120° 21' E)                                  |          |          |          | KM221967 |
| 34 | OLIGOHYMENOPHOREA | Scuticociliatia | Loxoccephalida | Cinetochilidae      | <i>Sathrophilus holtae</i>             | Stone man bathing beach, Qingdao (36° 06' N, 120° 29' E)                              |          |          |          | KM221968 |
| 35 | OLIGOHYMENOPHOREA | Scuticociliatia | Loxoccephalida | Loxoccephalidae     | <i>Cardiostomatella vermiformis</i>    | Taiping Bay, Qingdao (36° 03' N, 120° 22' E)                                          |          |          |          | KM221955 |
| 36 | OLIGOHYMENOPHOREA | Scuticociliatia | Loxoccephalida | Loxoccephalidae     | <i>Paratetrahymena wassi</i>           | Daya Bay, Guangzhou (22° 36'N, 114° 33' E)                                            |          |          |          | KM221963 |
| 37 | OLIGOHYMENOPHOREA | Scuticociliatia | Philasterida   | Orchitophryidae     | <i>Metanophrys sinensis</i>            | Mariculture pond, Weifang (37°06"N, 119°30")                                          |          |          |          | KM221961 |
| 38 | OLIGOHYMENOPHOREA | Scuticociliatia | Philasterida   | Paraurematidae      | <i>Miamiensis avidus</i>               | Mariculture pond, Weifang (37°06"N, 119°30")                                          |          |          |          | KM221962 |
| 39 | OLIGOHYMENOPHOREA | Scuticociliatia | Philasterida   | Philasteridae       | <i>Philasterides armatalis</i>         | No. 6 Bathing Beach, Qingdao (36° 03' N, 120° 19' E)                                  |          |          |          | KM221964 |
| 40 | OLIGOHYMENOPHOREA | Scuticociliatia | Philasterida   | Pseudocohnilembidae | <i>Pseudocohnilembus hargisi</i>       | Nansan Island, Zhanjiang (21° 11' N, 110° 27' E)                                      |          |          |          | KM221966 |
| 41 | OLIGOHYMENOPHOREA | Scuticociliatia | Philasterida   | Uronematidae        | <i>Uronema marinum</i>                 | Seawater along the coast of Yellow Sea, Qingdao (36°18' N, 120°43' E)                 |          |          |          | KM221969 |
| 42 | OLIGOHYMENOPHOREA | Scuticociliatia | Philasterida   | Orchitophryidae     | <i>Mesanophrys carcini</i>             | Clear Water Bay, Hong Kong (22° 20' N, 114°17' E)                                     |          |          |          | KM221960 |
| 43 | OLIGOHYMENOPHOREA | Scuticociliatia | Pleuronematida | Ancistridae         | <i>Ancistrum crassum</i>               | From the mantle cavity of the marine mollusk <i>Ruditapes philippinarum</i> , Qingdao |          |          |          | KM221953 |

|    |                   |                 |                |                   |                                     |                                                                                                       |          |          |          |          |
|----|-------------------|-----------------|----------------|-------------------|-------------------------------------|-------------------------------------------------------------------------------------------------------|----------|----------|----------|----------|
|    |                   |                 |                |                   |                                     | (36° 04' N, 120° 23' E)                                                                               |          |          |          |          |
| 44 | OLIGOHYMENOPHOREA | Scuticociliatia | Pleuronematida | Ctedoctematidae   | <i>Hippocomos salinus</i>           | Yangkou sandy beach, Qingdao (36°14'N, 120°40'E)                                                      |          |          |          | KM221959 |
| 45 | OLIGOHYMENOPHOREA | Scuticociliatia | Pleuronematida | Cyclidiidae       | <i>Cristigera media</i>             | No. 1 Bathing Beach, Qingdao (36° 03' N, 120° 21' E)                                                  |          |          |          | KM221957 |
| 46 | OLIGOHYMENOPHOREA | Scuticociliatia | Pleuronematida | Cyclidiidae       | <i>Protocyclidium citrullus</i>     | Estuary of Baisha River, Qingdao (36° 15' N, 120° 19' E)                                              |          |          |          | KM221958 |
| 47 | OLIGOHYMENOPHOREA | Scuticociliatia | Pleuronematida | Eurystomateliidae | <i>Wilbertia typica</i>             | Sculpture Park Bathing Beach, Qingdao (36° 05'N, 120° 27' E)                                          |          |          |          | KM221970 |
| 48 | OLIGOHYMENOPHOREA | Scuticociliatia | Pleuronematida | Hemispeiridae     | <i>Boveria subcylindrica</i>        | From the mantle cavity of the marine mollusk <i>Pinna pectinata</i> , Qingdao (36° 04' N, 120° 23' E) |          |          |          | KM221954 |
| 49 | OLIGOHYMENOPHOREA | Scuticociliatia | Pleuronematida | Pleuronematidae   | <i>Pleuronema setigerum</i>         | A port in Qingdao (36° 05' N, 120° 19' E)                                                             |          |          |          | KM221965 |
| 50 | PHYLLOPHARYNGEA   | Cyrtophoria     | Chlamyodontida | Chilodonellidae   | <i>Trithigmostoma cucullulus</i>    | Longxue Island, Guangzhou (22° 42' N, 113° 39' E)                                                     |          | KM222063 | KM222156 | KM221985 |
| 51 | PHYLLOPHARYNGEA   | Cyrtophoria     | Chlamyodontida | Chlamyodontidae   | <i>Chlamyodon mnemosyne</i>         | Nansha Port, Guangzhou (22° 48'N, 113° 36' E)                                                         |          |          |          | KM221986 |
| 52 | PHYLLOPHARYNGEA   | Cyrtophoria     | Chlamyodontida | Lynchellidae      | <i>Chlamydonella pseudochilodon</i> | Daya Bay, Guangzhou (22° 36'N, 114° 33' E)                                                            |          |          |          | KM222001 |
| 53 | PHYLLOPHARYNGEA   | Cyrtophoria     | Dysteriida     | Dysteriidae       | <i>Dysteria derouxi</i>             | Mai Island, Qingdao (36° 04' N, 120° 27' E)                                                           | KM222105 | KM222064 |          | KM222030 |
| 54 | PHYLLOPHARYNGEA   | Rhynchodia      | Hypocomatida   | Hypocomidae       | <i>Hypocoma acinetarum</i>          | Zhongyuan Dock, Qingdao (36° 03' N, 120° 19' E)                                                       |          |          | KM222157 | KM221983 |
| 55 | PHYLLOPHARYNGEA   | Suctoria        | Exogenida      | Ephelotidae       | <i>Ephelota gemmipara</i>           | Zhongyuan Dock, Qingdao (36° 03' N, 120° 19' E)                                                       |          | KM222065 | KM222158 | KM221976 |
| 56 | PHYLLOPHARYNGEA   | Synhymenia      | Synhymeniida   | Orthodonellidae   | <i>Orthodonella sp.</i>             | Mai Island, Qingdao (36° 04' N, 120° 27' E)                                                           |          |          |          | KM221979 |
| 57 | PHYLLOPHARYNGEA   | Synhymenia      | Synhymeniida   | Orthodonellidae   | <i>Zosterodasys agamalievi</i>      | Daya Bay, Guangzhou (22° 36'N, 114° 33' E)                                                            |          | KM222066 |          | KM221995 |
| 58 | PLAGIOPYLEA       |                 | Cyclotrichiida | Cyclotrichiida    | <i>Paraspathidium apofuscum</i>     | No. 6 Bathing Beach, Qingdao (36° 03' N, 120° 19' E)                                                  |          | KM222060 |          |          |

|    |              |               |                |                   |                                         |                                                                         |          |          |          |          |
|----|--------------|---------------|----------------|-------------------|-----------------------------------------|-------------------------------------------------------------------------|----------|----------|----------|----------|
| 59 | PLAGIOPYLEA  |               | Cyclotrichiida | Cyclotrichiidae   | <i>Askenasia sp.</i>                    | Gaoqiao, Zhanjiang (21° 37' N, 109° 49' E)                              |          |          |          | KM221994 |
| 60 | PLAGIOPYLEA  |               | Plagiopylida   | Plagiopylidae     | <i>Plagiopyla sp.</i>                   | Mai Island, Qingdao (36° 04' N, 120° 27' E)                             |          | KM222073 |          |          |
| 61 | PLAGIOPYLEA  |               | Plagiopylida   | Sonderiidae       | <i>Parasonderia vestita</i>             | No. 6 Bathing Beach, Qingdao (36° 03' N, 120° 19' E)                    |          | KM222072 |          |          |
| 62 | PROSTOMATEA  |               | Prorodontida   | Colepidae         | <i>Apocoleps magnus</i> cf.             | Mai Island, Qingdao (36° 04' N, 120° 27' E)                             |          |          |          | KM221987 |
| 63 | PROSTOMATEA  |               | Prorodontida   | Colepidae         | <i>Nolandia orientalis</i>              | Wanpingkou, Rizhao (35° 24' N, 119° 34' E)                              | KM222103 | KM222062 | KM222155 | KM222006 |
| 64 | PROSTOMATEA  |               | Prorodontida   | Colepidae         | <i>Plagiopogon loricatus</i>            | Sculpture Park Bathing Beach, Qingdao (36° 05' N, 120° 27' E)           |          |          |          | KM221990 |
| 65 | PROSTOMATEA  |               | Prorodontida   | Placidae          | <i>Placus salinus</i>                   | Mariculture pond, Weifang (37°06'N, 119°30'')                           |          |          |          | KM222004 |
| 66 | PROSTOMATEA  |               | Prorodontida   | Prorodontidae     | <i>Prorodon ovum</i>                    | No. 1 Bathing Beach, Qingdao (36° 03' N, 120° 21' E)                    | KM222104 |          |          | KM221980 |
| 83 | PROTOCRUZIEA |               | Protocruziida  | Protocruziidae    | <i>Protocruzia contrax</i>              | Seawater along the coast of Yellow Sea, Qingdao (36°18' N, 120°43' E)   |          | KM222050 | KM222144 |          |
| 67 | SPIROTRICHEA | ?             | Lynnellida     | Lynnellidae       | <i>Lynnella semiglobulosa</i>           | Daya Bay, Guangzhou (22° 36' N, 114° 33' E)                             |          | KM222051 | KM222145 | KM221996 |
| 68 | SPIROTRICHEA | Choreotrichia | Choreotrichida | Strombidinopsidae | <i>Strombidinopsis batos</i>            | Mangrove Reserve, Shenzhen (22° 32' N, 114° 00' E)                      | FJ881862 | KM222054 | KM222148 | KM221998 |
| 69 | SPIROTRICHEA | Choreotrichia | Tintinnida     | Ptychocyclididae  | <i>Favella campanula</i> cf.            | Daya Bay, Guangzhou (22° 36' N, 114° 33' E)                             | KM222099 | KM222057 | KM222151 | KM221992 |
| 70 | SPIROTRICHEA | Hypotrichia   | Discocephalida | Discocephalidae   | <i>Discocephalus rotatorius</i>         | Dameisha, Shenzhen (22° 36' N, 114° 19' E)                              |          | KM222046 | KM222138 |          |
| 71 | SPIROTRICHEA | Hypotrichia   | Discocephalida | Discocephalidae   | <i>Leptoamphisiella vermis</i>          | Seawater along the coast of Yellow Sea, Qingdao (36° 03' N, 120° 22' E) |          | KM222044 | KM222136 |          |
| 85 | SPIROTRICHEA | Hypotrichia   | Discocephalida | Discocephalidae   | <i>Pseudoamphisiella quadrinucleata</i> | Daya Bay, Guangzhou (22° 36' N, 114° 33' E)                             |          |          | KM222123 |          |
| 72 | SPIROTRICHEA | Hypotrichia   | Euplotida      | Certesiidae       | <i>Certesias quadrinucleata</i>         | Taiping Bay, Qingdao (36° 03' N, 120° 22' E)                            | KM222097 | KM222049 | KM222143 | KM221974 |
| 73 | SPIROTRICHEA | Hypotrichia   | Euplotida      | Discocephalidae   | <i>Paradisiscocephalus</i>              | A port in Qingdao (36° 05' N, 120° 19' E)                               |          | KM222047 | KM222140 | KM221988 |

|    |              |                  |                 |                  |                                       |                                                                                                           |          |          |          |          |
|----|--------------|------------------|-----------------|------------------|---------------------------------------|-----------------------------------------------------------------------------------------------------------|----------|----------|----------|----------|
|    |              |                  |                 |                  | <i>elongatus</i>                      |                                                                                                           |          |          |          |          |
| 75 | SPIROTRICHEA | Hypotrichia      | Euplotida       | Euplotidae       | <i>Euplotes encysticus</i>            | Daya Bay, Guangzhou (22° 36'N, 114° 33' E)                                                                |          |          | KM222141 |          |
| 74 | SPIROTRICHEA | Hypotrichia      | Euplotida       | Euplotidae       | <i>Euplotes sinicus</i>               | Daya Bay, Guangzhou (22° 36'N, 114° 33' E)                                                                |          |          | KM222139 |          |
| 76 | SPIROTRICHEA | Hypotrichia      | Euplotida       | Gastrocirrhidae  | <i>Gastrocirrhus monilifer</i>        | Zhongyuan Dock, Qingdao (36° 03' N, 120° 19' E)                                                           |          | KM222048 | KM222142 |          |
| 78 | SPIROTRICHEA | Oligotrichia     | Strombidiida    | Strobilidiidae   | <i>Pelagostrobilidium minutum</i>     | Hengqin Island, Zhuhai (22° 10' N, 113° 31' E)                                                            |          | KM222055 | KM222149 | KM221991 |
| 79 | SPIROTRICHEA | Oligotrichia     | Strombidiida    | Strobilidiidae   | <i>Rimostrobilidium veniliae</i>      | Daya Bay, Guangzhou (22° 36'N, 114° 33' E)                                                                |          | KM222056 | KM222150 | KM221993 |
| 80 | SPIROTRICHEA | Oligotrichia     | Strombidiida    | Strombidiidae    | <i>Spirostrobilidium schizostomum</i> | Mangrove Reserve, Shenzhen (22° 32'N, 114° 00' E)                                                         | KM222098 | KM222053 | KM222147 | KM222000 |
| 81 | SPIROTRICHEA | Oligotrichia     | Strombidiida    | Strombidiidae    | <i>Strombidium stylifer</i>           | Mangrove Reserve, Shenzhen (22° 32'N, 114° 00' E)                                                         |          |          | KJ609058 | KM221999 |
| 82 | SPIROTRICHEA | Oligotrichia     | Strombidiida    | Tontoniidae      | <i>Pseudotontonia simplicidens</i>    | Daya Bay, Guangzhou (22° 36'N, 114° 33' E)                                                                |          | KM222052 | KM222146 | KM221997 |
| 84 | SPIROTRICHEA | Protohypotrichia | Kiitrichida     | Kiitrichidae     | <i>Caryotricha minuta</i>             | Clear Water Bay, Hong Kong (22° 20' N, 114° 17' E)                                                        |          | KM222036 | KM222125 | KM222026 |
| 86 | SPIROTRICHEA | Stichotrichia    | Sporadotrichida | Oxytrichidae     | <i>Hemigastrostyla enigmatica</i>     | Clear Water Bay, Hong Kong (22° 20' N, 114° 17' E)                                                        | FJ870096 | KM222035 | KM222124 | KM222027 |
| 87 | SPIROTRICHEA | Stichotrichia    | Sporadotrichida | Oxytrichidae     | <i>Tachysoma pellionellum</i>         | No. 1 Bathing Beach, Qingdao (36° 03' N, 120° 21' E)                                                      | KM222096 | KM222045 | KM222137 | KM222015 |
| 88 | SPIROTRICHEA | Stichotrichia    | Sporadotrichida | Oxytrichidae     | <i>Tetmemena puslata</i>              | The intertidal zone at the estuary of the Pearl River, Seagull Village, Guangzhou (22° 59' N, 113° 32' E) | KM222092 | KM222037 | KM222126 | KM222018 |
| 89 | SPIROTRICHEA | Stichotrichia    | Sporadotrichida | Trachelostylidae | <i>Trachelostyla pediculiformis</i>   | Mangrove Reserve, Shenzhen (22° 32'N, 114° 00' E)                                                         |          | KM222038 | KM222127 | KM222017 |
| 90 | SPIROTRICHEA | Stichotrichia    | Stichotrichida  | Amphisiellidae   | <i>Amphisiella annulata</i>           | Zhongyuan Dock, Qingdao (36° 03' N, 120° 19' E)                                                           |          | KM222043 | KM222135 | KM222014 |
| 91 | SPIROTRICHEA | Stichotrichia    | Stichotrichida  | Amphisiellidae   | <i>Paracladotricha salina</i>         | An offshore mollusc-farming pond of the Red island off the mouth area of Jiaozhou                         |          | KM222033 | KM222121 | KM222010 |

|     |              |               |                |                    |                                           |                                                                         |          |          |          |          |
|-----|--------------|---------------|----------------|--------------------|-------------------------------------------|-------------------------------------------------------------------------|----------|----------|----------|----------|
|     |              |               |                |                    |                                           | Bay of Qingdao (N 36°04', E 120°18')                                    |          |          |          |          |
| 92  | SPIROTRICHEA | Stichotrichia | Stichotrichida | Amphisiellidae     | <i>Uroleptoides qingdaoensis</i>          | The lawn in University of Hebei, Baoding (38° 53' N, 115° 31' E)        | KM222091 | KM222032 | KM222120 | KM221971 |
| 93  | SPIROTRICHEA | Stichotrichia | Stichotrichida | Kahliellidae       | <i>Pseudokahliella marina</i>             | Daya Bay, Guangzhou (22° 36'N, 114° 33' E)                              | KM222095 | KM222041 | KM222133 | KM222019 |
| 94  | SPIROTRICHEA | Stichotrichia | Stichotrichida | Spirofilidae       | <i>Strongylidium orientale</i>            | Mipu Reserve, Hongkong (22° 30'N, 114° 04' E)                           |          | KM222034 | KM222122 | KM221972 |
| 95  | SPIROTRICHEA | Stichotrichia | Urostylida     | Epiclintidae       | <i>Epiclintes auricularis auricularis</i> | Mai Island, Qingdao (36° 04' N, 120° 27' E)                             |          |          | KM222128 |          |
| 96  | SPIROTRICHEA | Stichotrichia | Urostylida     | Pseudokeronopsidae | <i>Nothoholosticha fasciola</i>           | Mai Island, Qingdao (36° 04' N, 120° 27' E)                             |          |          |          | KM222011 |
| 97  | SPIROTRICHEA | Stichotrichia | Urostylida     | Pseudokeronopsidae | <i>Pseudokeronopsis flava</i>             | Coastal seawater, Zhanjiang (21°15' N, 110° 22' E)                      |          |          |          | KM221973 |
| 98  | SPIROTRICHEA | Stichotrichia | Urostylida     | Pseudokeronopsidae | <i>Uroleptopsis citrina</i>               | No. 2 Bathing Beach, Qingdao (36° 03' N, 120° 21' E)                    |          |          |          | KM222013 |
| 99  | SPIROTRICHEA | Stichotrichia | Urostylida     | Pseudourostylidae  | <i>Pseudourostyla sp.</i>                 | Qi'ao Island, Zhuhai (22° 26' N, 113° 38' E)                            |          | KM222042 | KM222134 | KM222016 |
| 100 | SPIROTRICHEA | Stichotrichia | Urostylida     | Urostylidae        | <i>Anteholosticha petzi</i>               | Estuary of Haibo River, Qingdao (36° 07' N, 120° 20' E)                 | KM222093 | KM222039 | KM222130 |          |
| 101 | SPIROTRICHEA | Stichotrichia | Urostylida     | Urostylidae        | <i>Holosticha diademata</i>               | Seawater along the coast of Yellow Sea, Qingdao (36° 03' N, 120° 22' E) |          |          | KM222131 | KM222009 |
| 102 | SPIROTRICHEA | Stichotrichia | Urostylida     | Urostylidae        | <i>Holosticha heterofoissneri</i>         | No. 6 Bathing Beach, Qingdao (36° 03' N, 120° 19' E)                    | KM222094 | KM222040 | KM222132 | KM222012 |
| 103 | SPIROTRICHEA | Stichotrichia | Urostylida     | Urostylidae        | <i>Neurostylopsis flavicana</i>           | Mangrove Reserve, Shenzhen (22° 32'N, 114° 00' E)                       |          |          |          | KM222028 |
| 104 | SPIROTRICHEA | Stichotrichia | Urostylida     | Urostylidae        | <i>Parabirojimia multinucleata</i>        | Daya Bay, Guangzhou (22° 36'N, 114° 33' E)                              |          |          | KM222129 |          |



**Table S2.** List of species for which SSU rDNA, 5.8S rDNA, LSU rDNA, and alpha-tubulin were used in the present work.

|    | Class         | Subclass | Order               | Family            | Taxon                            | Source              | 18S      | ITS1-5.8S-ITS2 | 28S      | a-tubulin |
|----|---------------|----------|---------------------|-------------------|----------------------------------|---------------------|----------|----------------|----------|-----------|
| 1  | ARMOPHOREA    |          | Armophorida         | Metopidae         | <i>Metopus palaeformis</i>       | GenBank             | AY007450 | NA             | NA       | AY041133  |
| 2  | ARMOPHOREA    |          | Clevelandellida     | Clevelandellidae  | <i>Clevelandella panesthiae</i>  | GenBank             | KC139719 | KC460347       | NA       | NA        |
| 3  | ARMOPHOREA    |          | Clevelandellida     | Nyctotheridae     | <i>Nyctotherus ovalis</i>        | GenBank             | AJ222678 | AJ006714       | NA       | DQ665926  |
| 4  | COLPODEA      |          | Bryometopida        | Bryometopida      | <i>Bryometopus atypicus</i>      | GenBank             | EU039886 | NA             | NA       | NA        |
| 5  | COLPODEA      |          | Bryophryida         | Bryophryidae      | <i>Notoxoma parabryophryides</i> | GenBank             | EU039903 | NA             | NA       | NA        |
| 6  | COLPODEA      |          | Bursariomorphida    | Bursariidae       | <i>Bursaria truncatella</i>      | GenBank             | U82204   | NA             | NA       | NA        |
| 7  | COLPODEA      |          | Colpodida           | Colpodidae        | <i>Colpoda inflata</i>           | Lab of Protozoology | KM222106 | KM222071       | KM222160 | NA        |
| 8  | COLPODEA      |          | Colpodida           | Hausmanniellidae  | <i>Bresslauides discoideus</i>   | GenBank             | HM140394 | NA             | HM122014 | NA        |
| 9  | COLPODEA      |          | Cyrtolophosidida    | Platyophryidae    | <i>Platyophryides magnus</i>     | GenBank             | HM140395 | NA             | HM122030 | NA        |
| 10 | COLPODEA      |          | Sorogenida          | Sorogenidae       | <i>Sorogena stoianovitchae</i>   | GenBank             | AF300285 | NA             | NA       | NA        |
| 11 | HETEROTRICHEA |          | Heterotrichida      | Climacostomidae   | <i>Climacostomum virens</i>      | Lab of Protozoology | EU583990 | NA             | KM222165 | KM221978  |
| 12 | HETEROTRICHEA |          | Heterotrichida      | Climacostomidae   | <i>Fabrea salina</i>             | Lab of Protozoology | KM222110 | KM222078       | KM222167 | KM222005  |
| 13 | HETEROTRICHEA |          | Heterotrichida      | Condylostomatidae | <i>Condylostoma magnum</i>       | Lab of Protozoology | KM222108 | KM222076       | KM222163 | KM221981  |
| 14 | HETEROTRICHEA |          | Heterotrichida      | Folliculinidae    | <i>Folliculina simplex</i>       | Lab of Protozoology | EU583992 | KM222079       | KM222168 | KM221977  |
| 15 | HETEROTRICHEA |          | Heterotrichida      | Peritromidae      | <i>Peritromus faurei</i>         | Lab of Protozoology | EU583993 | KM222080       | KM222169 | NA        |
| 16 | HETEROTRICHEA |          | Heterotrichida      | Spirostomidae     | <i>Anigsteinia clarissima</i>    | Lab of Protozoology | KM222109 | KM222077       | KM222166 | KM221982  |
| 17 | HETEROTRICHEA |          | Heterotrichida      | Spirostomidae     | <i>Spirostomum sp.</i>           | Lab of Protozoology | FJ998027 | KM222081       | KM222170 | KM222008  |
| 18 | HETEROTRICHEA |          | Heterotrichida      | Stentoridae       | <i>Stentor sp.</i>               | Lab of Protozoology | KM222111 | KM222082       | KM222171 | KM222003  |
| 19 | KARYORELICTEA |          | ?                   | Wilbertomorphidae | <i>Wilbertomorpha colpoda</i>    | Lab of Protozoology | KC461119 | NA             | NA       | NA        |
| 20 | KARYORELICTEA |          | Loxodida            | Loxodidae         | <i>Loxodes cf. striatus</i>      | Lab of Protozoology | KM222107 | KM222075       | KM222162 | NA        |
| 21 | KARYORELICTEA |          | Loxodida            | Loxodidae         | <i>Remanella granulosa</i>       | Lab of Protozoology | JQ768408 | NA             | NA       | KM221984  |
| 22 | KARYORELICTEA |          | Protoheterotrichida | Geleidae          | <i>Geleia sinica</i>             | Lab of Protozoology | JF437558 | KM222074       | KM222161 | NA        |
| 23 | KARYORELICTEA |          | Protostomatida      | Kentrophoridae    | <i>Kentrophoros gracilis</i>     | Lab of Protozoology | FJ467506 | NA             | NA       | KM222029  |
| 24 | KARYORELICTEA |          | Protostomatida      | Trachelocercidae  | <i>Trachelocerca sagitta</i>     | Lab of Protozoology | KC542935 | NA             | NA       | NA        |

|    |                   |                |                   |                    |                                     |                     |          |          |          |          |
|----|-------------------|----------------|-------------------|--------------------|-------------------------------------|---------------------|----------|----------|----------|----------|
| 25 | LICNOPHOREA       |                | Licnophorida      | Licnophoridae      | <i>Licnophora cf. lyngbycola</i>    | Lab of Protozoology | FJ876955 | NA       | KM222164 | KM222007 |
| 26 | LITOSTOMATEA      | Haptoria       | Haptorida         | Acropisthiidae     | <i>Chaenea sp.</i>                  | Lab of Protozoology | FJ876970 | KM222059 | KM222153 | JF975407 |
| 27 | LITOSTOMATEA      | Haptoria       | Haptorida         | Helicoprodontidae  | <i>Helicoprodon maximus</i>         | Lab of Protozoology | KM222102 | KM222061 | KM222154 | KM221989 |
| 28 | LITOSTOMATEA      | Haptoria       | Haptorida         | Helicoprodontidae  | <i>Trachelotractus entzi</i>        | Lab of Protozoology | FJ463745 | NA       | JF975394 | JF975403 |
| 29 | LITOSTOMATEA      | Haptoria       | Haptorida         | Lacrymariidae      | <i>Phialina salinarum</i>           | Lab of Protozoology | EU242508 | NA       | JF975395 | JF975404 |
| 30 | LITOSTOMATEA      | Haptoria       | Haptorida         | Tracheliidae       | <i>Dileptus sp.</i>                 | Lab of Protozoology | KM222100 | NA       | KM222152 | KM221975 |
| 31 | LITOSTOMATEA      | Haptoria       | Pleurostomatida   | Amphileptidae      | <i>Amphileptus songi</i>            | Lab of Protozoology | FJ876974 | KM222058 | JF975389 | JF975397 |
| 32 | LITOSTOMATEA      | Haptoria       | Pleurostomatida   | Amphileptidae      | <i>Epiphyllum shenzhenense</i>      | Lab of Protozoology | GU574809 | NA       | JF975392 | JF975408 |
| 33 | LITOSTOMATEA      | Trichostomatia | Entodiniomorphida | Troglodytelliidae  | <i>Troglodytella abressarti</i>     | GenBank             | AB437346 | EU680311 | NA       | NA       |
| 34 | LITOSTOMATEA      | Trichostomatia | Vestibuliferida   | Balantidiidae      | <i>Balantidium entozoon</i>         | GenBank             | EU581716 | JQ408694 | NA       | NA       |
| 35 | MESODINIEA        |                | MESODINIIDA       | Mesodiniidae       | <i>Mesodinium acarus</i>            | Lab of Protozoology | KM222101 | NA       | NA       | NA       |
| 36 | NASSOPHOREA       |                | Discotrichida     | Discotrichidae     | <i>Discotricha papillifera</i>      | Lab of Protozoology | JQ918368 | KM222067 | KC832966 | NA       |
| 37 | NASSOPHOREA       |                | Microthoracida    | Leptopharyngidae   | <i>Leptopharynx costatus</i>        | Lab of Protozoology | EU286811 | NA       | KC832958 | NA       |
| 38 | NASSOPHOREA       |                | Nassulida         | Furgasoniidae      | <i>Parafurgasonia sp.</i>           | Lab of Protozoology | KC832955 | KM222070 | KM222159 | NA       |
| 39 | NASSOPHOREA       |                | Nassulida         | Nassulidae         | <i>Nassula labiata</i>              | Lab of Protozoology | KC832949 | KM222069 | KC832957 | NA       |
| 40 | OLIGOHYMENOPHOREA | Apostomatia    | Apostomatida      | Colliniidae        | <i>Pseudocollinia beringensis</i>   | GenBank             | HQ591474 | HQ591474 | HQ591474 | NA       |
| 41 | OLIGOHYMENOPHOREA | Astomatia      | Astomatida        | Anoplophryidae     | <i>Almophrya bivacuolata</i>        | GenBank             | HQ446281 | HQ446281 | NA       | NA       |
| 42 | OLIGOHYMENOPHOREA | Hymenostomatia | Ophryoglenida     | Ichthyophthiriidae | <i>Ichthyophthirius multifiliis</i> | GenBank             | U17354   | DQ270016 | EU185635 | EGR31414 |
| 43 | OLIGOHYMENOPHOREA | Hymenostomatia | Tetrahymenida     | Tetrahymenidae     | <i>Tetrahymena thermophila</i>      | GenBank             | X56165   | JN547815 | JN547815 | AAA21350 |
| 44 | OLIGOHYMENOPHOREA | Peniculia      | Paranassulida     | Paranassulidae     | <i>Paranassula sp.</i>              | Lab of Protozoology | KC832956 | KM222068 | KC832964 | NA       |
| 45 | OLIGOHYMENOPHOREA | Peniculia      | Peniculida        | Frontoniidae       | <i>Frontonia canadensis</i>         | Lab of Protozoology | KM222112 | KM222083 | KM222172 | KM222002 |
| 46 | OLIGOHYMENOPHOREA | Peniculia      | Peniculida        | Lembadionidae      | <i>Lembadion sp.</i>                | Lab of Protozoology | KM222113 | KM222084 | KM222173 | NA       |
| 47 | OLIGOHYMENOPHOREA | Peniculia      | Peniculida        | Parameciidae       | <i>Paramecium tetraurelia</i>       | GenBank             | AY102613 | JX661316 | EU828456 | CAA67847 |
| 48 | OLIGOHYMENOPHOREA | Peniculia      | Urocentrida       | Urocentridae       | <i>Urocentrum turbo</i>             | GenBank             | AF255357 | EF114295 | KF287650 | NA       |
| 49 | OLIGOHYMENOPHOREA | Peritrichia    | Mobilida          | Trichodinidae      | <i>Trichodina heterodentata</i>     | GenBank             | AY788099 | NA       | NA       | EF569680 |
| 50 | OLIGOHYMENOPHOREA | Peritrichia    | Mobilida          | Trichodinidae      | <i>Trichodinella myakkae</i>        | GenBank             | AY102176 | NA       | NA       | EF569678 |
| 51 | OLIGOHYMENOPHOREA | Peritrichia    | Sessilida         | Epistylididae      | <i>Epistylis sp.</i>                | Lab of Protozoology | KM222114 | KM222085 | KM222174 | KM222025 |

|    |                   |                 |                |                     |                                        |                     |          |          |          |          |
|----|-------------------|-----------------|----------------|---------------------|----------------------------------------|---------------------|----------|----------|----------|----------|
| 52 | OLIGOHYMENOPHOREA | Peritrichia     | Sessilida      | Epistylididae       | <i>Pseudepistylis songi</i>            | Lab of Protozoology | KM222115 | KM222086 | KM222175 | KM222023 |
| 53 | OLIGOHYMENOPHOREA | Peritrichia     | Sessilida      | Opisthnectidae      | <i>Opisthnecta sp.</i>                 | Lab of Protozoology | KM222119 | KM222090 | KM222179 | KM222024 |
| 54 | OLIGOHYMENOPHOREA | Peritrichia     | Sessilida      | Vorticellidae       | <i>Carchesium polypinum</i>            | GenBank             | GU987027 | GU987034 | NA       | FJ883553 |
| 55 | OLIGOHYMENOPHOREA | Peritrichia     | Sessilida      | Vorticellidae       | <i>Epicarchesium abrae</i>             | GenBank             | DQ190462 | EU340854 | NA       | NA       |
| 56 | OLIGOHYMENOPHOREA | Peritrichia     | Sessilida      | Vorticellidae       | <i>Pseudovorticella shii</i>           | Lab of Protozoology | KM222116 | KM222087 | KM222176 | KM222020 |
| 57 | OLIGOHYMENOPHOREA | Peritrichia     | Sessilida      | Vorticellidae       | <i>Vorticella chiangi</i>              | Lab of Protozoology | KM222117 | KM222088 | KM222177 | KM222021 |
| 58 | OLIGOHYMENOPHOREA | Peritrichia     | Sessilida      | Zoothamniidae       | <i>Zoothamnium hentscheli</i>          | Lab of Protozoology | KM222118 | KM222089 | KM222178 | KM222022 |
| 59 | OLIGOHYMENOPHOREA | Peritrichia     | Sessilida      | Zoothamniidae       | <i>Zoothamnopsis sinica</i>            | Lab of Protozoology | DQ190469 | NA       | NA       | KM222031 |
| 60 | OLIGOHYMENOPHOREA | Scuticociliatia | Loxoccephalida | Cinetochilidae      | <i>Cinetochilum ovale</i>              | Lab of Protozoology | FJ870103 | JX310025 | JX310025 | KM221956 |
| 61 | OLIGOHYMENOPHOREA | Scuticociliatia | Loxoccephalida | Cinetochilidae      | <i>Pseudoplatynematum denticulatum</i> | Lab of Protozoology | JX310020 | JX310004 | JX310028 | KM221967 |
| 62 | OLIGOHYMENOPHOREA | Scuticociliatia | Loxoccephalida | Cinetochilidae      | <i>Sathrophilus holtae</i>             | Lab of Protozoology | FJ868188 | JX310029 | JX310029 | KM221968 |
| 63 | OLIGOHYMENOPHOREA | Scuticociliatia | Loxoccephalida | Loxoccephalidae     | <i>Cardiostomatella vermiformis</i>    | Lab of Protozoology | AY881632 | JX310024 | JX310024 | KM221955 |
| 64 | OLIGOHYMENOPHOREA | Scuticociliatia | Loxoccephalida | Loxoccephalidae     | <i>Paratetrahymena wassi</i>           | Lab of Protozoology | GQ292767 | JX310009 | JX310027 | KM221963 |
| 65 | OLIGOHYMENOPHOREA | Scuticociliatia | Philasterida   | Orchitophryidae     | <i>Metanophrys sinensis</i>            | Lab of Protozoology | HM236336 | JN885092 | JN885114 | KM221961 |
| 66 | OLIGOHYMENOPHOREA | Scuticociliatia | Philasterida   | Paraaronematidae    | <i>Miamiensis avidus</i>               | Lab of Protozoology | JN885091 | JN885095 | JN885115 | KM221962 |
| 67 | OLIGOHYMENOPHOREA | Scuticociliatia | Philasterida   | Philasteridae       | <i>Philasterides armatalis</i>         | Lab of Protozoology | FJ848877 | JN885098 | JN885120 | KM221964 |
| 68 | OLIGOHYMENOPHOREA | Scuticociliatia | Philasterida   | Pseudocohnilembidae | <i>Pseudocohnilembus hargisi</i>       | Lab of Protozoology | JN885090 | JN885100 | JN885122 | KM221966 |
| 69 | OLIGOHYMENOPHOREA | Scuticociliatia | Philasterida   | Uronematidae        | <i>Uronema marinum</i>                 | Lab of Protozoology | GQ465466 | JN885102 | JN885124 | KM221969 |
| 70 | OLIGOHYMENOPHOREA | Scuticociliatia | Philasterida   | Orchitophryidae     | <i>Mesanophrys carcini</i>             | Lab of Protozoology | JN885086 | JN885104 | JN885113 | KM221960 |
| 71 | OLIGOHYMENOPHOREA | Scuticociliatia | Pleuronematida | Ancistridae         | <i>Ancistrum crassum</i>               | Lab of Protozoology | HM236340 | KF256831 | KF256825 | KM221953 |
| 72 | OLIGOHYMENOPHOREA | Scuticociliatia | Pleuronematida | Ctedoctematidae     | <i>Hippocomos salinus</i>              | Lab of Protozoology | JX310012 | JX310023 | JX310023 | KM221959 |
| 73 | OLIGOHYMENOPHOREA | Scuticociliatia | Pleuronematida | Cyclidiidae         | <i>Cristigera media</i>                | Lab of Protozoology | FJ868180 | KF256827 | KF256827 | KM221957 |
| 74 | OLIGOHYMENOPHOREA | Scuticociliatia | Pleuronematida | Cyclidiidae         | <i>Protocyclidium citrullus</i>        | Lab of Protozoology | KF256820 | KF256832 | KF256823 | KM221958 |
| 75 | OLIGOHYMENOPHOREA | Scuticociliatia | Pleuronematida | Eurystomateliidae   | <i>Wilbertia typica</i>                | Lab of Protozoology | JX310022 | JX310031 | JX310031 | KM221970 |
| 76 | OLIGOHYMENOPHOREA | Scuticociliatia | Pleuronematida | Hemispairidae       | <i>Boveria subcylindrica</i>           | Lab of Protozoology | FJ848878 | NA       | KF256826 | KM221954 |
| 77 | OLIGOHYMENOPHOREA | Scuticociliatia | Pleuronematida | Pleuronematidae     | <i>Pleuronema setigerum</i>            | Lab of Protozoology | FJ848874 | JX310006 | NA       | KM221965 |
| 78 | PHYLLOPHARYNGEA   | Chonotrichia    | Cryptogemmida  | Isochonidae         | <i>Isochona sp.</i>                    | GenBank             | AY242116 | NA       | NA       | NA       |

|     |                 |               |                 |                   |                                     |                     |          |          |          |          |
|-----|-----------------|---------------|-----------------|-------------------|-------------------------------------|---------------------|----------|----------|----------|----------|
| 79  | PHYLLOPHARYNGEA | Cyrtophoria   | Chlamyodontida  | Chilodonellidae   | <i>Trithigmostoma cucullulus</i>    | Lab of Protozoology | FJ998037 | KM222063 | KM222156 | KM221985 |
| 80  | PHYLLOPHARYNGEA | Cyrtophoria   | Chlamyodontida  | Chlamyodontidae   | <i>Chlamyodon mnemosyne</i>         | Lab of Protozoology | FJ998031 | NA       | NA       | KM221986 |
| 81  | PHYLLOPHARYNGEA | Cyrtophoria   | Chlamyodontida  | Lynchellidae      | <i>Chlamydonella pseudochilodon</i> | Lab of Protozoology | FJ998032 | NA       | NA       | KM222001 |
| 82  | PHYLLOPHARYNGEA | Cyrtophoria   | Dysteriida      | Dysteriidae       | <i>Dysteria derouxi</i>             | Lab of Protozoology | KM222105 | KM222064 | KC832960 | KM222030 |
| 83  | PHYLLOPHARYNGEA | Rhynchodia    | Hypocomatida    | Hypocomidae       | <i>Hypocoma acinetarum</i>          | Lab of Protozoology | JN867019 | NA       | KM222157 | KM221983 |
| 84  | PHYLLOPHARYNGEA | Suctoria      | Endogenida      | Acinetidae        | <i>Acineta tuberosa</i>             | Lab of Protozoology | FJ865206 | NA       | NA       | NA       |
| 85  | PHYLLOPHARYNGEA | Suctoria      | Evaginogenida   | Heliophryidae     | <i>Heliophrya erhardi</i>           | GenBank             | AY007446 | NA       | NA       | AY041138 |
| 86  | PHYLLOPHARYNGEA | Suctoria      | Exogenida       | Ephelotidae       | <i>Ephelota gemmipara</i>           | Lab of Protozoology | EU600180 | KM222065 | KM222158 | KM221976 |
| 87  | PHYLLOPHARYNGEA | Suctoria      | Exogenida       | Paracinetidae     | <i>Paracineta limbata</i>           | Lab of Protozoology | FJ865207 | NA       | NA       | NA       |
| 88  | PHYLLOPHARYNGEA | Synhymenia    | Synhymeniida    | Orthodonellidae   | <i>Orthodonella sp.</i>             | Lab of Protozoology | KC832952 | NA       | KC832963 | KM221979 |
| 89  | PHYLLOPHARYNGEA | Synhymenia    | Synhymeniida    | Orthodonellidae   | <i>Zosterodasys agamalievi</i>      | Lab of Protozoology | FJ998040 | KM222066 | KC832961 | KM221995 |
| 90  | PLAGIOPYLEA     |               | Cyclotrichiida  | Cyclotrichiidae   | <i>Paraspathidium apofuscum</i>     | Lab of Protozoology | FJ875140 | KM222060 | JF975391 | JF975401 |
| 91  | PLAGIOPYLEA     |               | Cyclotrichiida  | Cyclotrichiidae   | <i>Askenasia sp.</i>                | Lab of Protozoology | KC771341 | KC771343 | KC771338 | KM221994 |
| 92  | PLAGIOPYLEA     |               | Cyclotrichiida  | Cyclotrichiidae   | <i>Cyclotrichium cyclokaryon</i>    | Lab of Protozoology | FJ876971 | NA       | JF975396 | JF975406 |
| 93  | PLAGIOPYLEA     |               | Cyclotrichiida  | Plagiocampidae    | <i>Plagiocampa sp.</i>              | Lab of Protozoology | KC832950 | KC771347 | KC832962 | NA       |
| 94  | PLAGIOPYLEA     |               | Odontostomatida | Epalxellidae      | <i>Epalxella antiquorum</i>         | GenBank             | EF014286 | NA       | NA       | NA       |
| 95  | PLAGIOPYLEA     |               | Plagiopylida    | Plagiopylidae     | <i>Plagiopyla sp.</i>               | Lab of Protozoology | FJ875150 | KM222073 | NA       | JF975402 |
| 96  | PLAGIOPYLEA     |               | Plagiopylida    | Sonderiidae       | <i>Parasonderia vestita</i>         | Lab of Protozoology | JN857941 | KM222072 | NA       | NA       |
| 97  | PROSTOMATEA     |               | Prorodontida    | Colepidae         | <i>Apocoleps cf. magnus</i>         | Lab of Protozoology | HM747137 | NA       | NA       | KM221987 |
| 98  | PROSTOMATEA     |               | Prorodontida    | Colepidae         | <i>Nolandia orientalis</i>          | Lab of Protozoology | KM222103 | KM222062 | KM222155 | KM222006 |
| 99  | PROSTOMATEA     |               | Prorodontida    | Colepidae         | <i>Plagiopogon loricatus</i>        | Lab of Protozoology | KC771342 | KC771344 | KC771339 | KM221990 |
| 100 | PROSTOMATEA     |               | Prorodontida    | Placidae          | <i>Placus salinus</i>               | Lab of Protozoology | KC832954 | KC771346 | KC832959 | KM222004 |
| 101 | PROSTOMATEA     |               | Prorodontida    | Prorodontidae     | <i>Prorodon ovum</i>                | Lab of Protozoology | KM222104 | KC771345 | KC771340 | KM221980 |
| 102 | PROTOCRUZIEA    |               | Protocruziida   | Protocruziidae    | <i>Protocruzia contrax</i>          | Lab of Protozoology | DQ190467 | KM222050 | KM222144 | EF198665 |
| 103 | SPIROTRICHEA    | ?             | Lynnellida      | Lynnellidae       | <i>Lynnella semiglobulosa</i>       | Lab of Protozoology | FJ876965 | KM222051 | KM222145 | KM221996 |
| 104 | SPIROTRICHEA    | Choreotrichia | Choreotrichida  | Strombidinopsidae | <i>Strombidinopsis batos</i>        | Lab of Protozoology | FJ881862 | KM222054 | KM222148 | KM221998 |
| 105 | SPIROTRICHEA    | Choreotrichia | Tintinnida      | Codonellidae      | <i>Tintinnopsis tubulosoides</i>    | GenBank             | AF399111 | AF399030 | NA       | AF399112 |
| 106 | SPIROTRICHEA    | Choreotrichia | Tintinnida      | Metacylidiidae    | <i>Helicostomella subulata</i>      | GenBank             | JQ716991 | JX000468 | JN831876 | NA       |

|     |              |                  |                 |                 |                                         |                     |          |          |          |          |
|-----|--------------|------------------|-----------------|-----------------|-----------------------------------------|---------------------|----------|----------|----------|----------|
| 107 | SPIROTRICHEA | Choreotrichia    | Tintinnida      | Ptychocylididae | <i>Favella cf. campanula</i>            | Lab of Protozoology | KM222099 | KM222057 | KM222151 | KM221992 |
| 108 | SPIROTRICHEA | Hypotrichia      | Discocephalida  | Discocephalidae | <i>Discocephalus rotatorius</i>         | Lab of Protozoology | JX460983 | KM222046 | KM222138 | JQ736719 |
| 109 | SPIROTRICHEA | Hypotrichia      | Discocephalida  | Discocephalidae | <i>Leptoamphisiella vermis</i>          | Lab of Protozoology | FJ865203 | KM222044 | KM222136 | JQ736707 |
| 110 | SPIROTRICHEA | Hypotrichia      | Discocephalida  | Discocephalidae | <i>Paradisococephalus elongatus</i>     | Lab of Protozoology | EU684746 | KM222047 | KM222140 | KM221988 |
| 111 | SPIROTRICHEA | Hypotrichia      | Discocephalida  | Discocephalidae | <i>Pseudoamphisiella quadrinucleata</i> | Lab of Protozoology | EU518416 | GQ246484 | KM222123 | GQ258109 |
| 112 | SPIROTRICHEA | Hypotrichia      | Euplotida       | Aspidiscidae    | <i>Aspidisca leptaspis</i>              | Lab of Protozoology | EU880597 | FJ600369 | JF694064 | JQ736687 |
| 113 | SPIROTRICHEA | Hypotrichia      | Euplotida       | Certesidae      | <i>Certesias quadrinucleata</i>         | Lab of Protozoology | KM222097 | KM222049 | KM222143 | KM221974 |
| 114 | SPIROTRICHEA | Hypotrichia      | Euplotida       | Euplotidae      | <i>Euplotes encysticus</i>              | Lab of Protozoology | FJ346569 | NA       | KM222141 | JQ736725 |
| 115 | SPIROTRICHEA | Hypotrichia      | Euplotida       | Euplotidae      | <i>Euplotes sinicus</i>                 | Lab of Protozoology | FJ876980 | NA       | KM222139 | JQ736734 |
| 116 | SPIROTRICHEA | Hypotrichia      | Euplotida       | Gastrocirrhidae | <i>Gastrocirrhus monilifer</i>          | Lab of Protozoology | DQ864734 | KM222048 | KM222142 | JQ918351 |
| 117 | SPIROTRICHEA | Hypotrichia      | Euplotida       | Uronychiidae    | <i>Diophrys parappendiculata</i>        | Lab of Protozoology | EU267928 | JF694074 | JF694056 | JQ736739 |
| 118 | SPIROTRICHEA | Hypotrichia      | Euplotida       | Uronychiidae    | <i>Uronychia sinica</i>                 | Lab of Protozoology | FJ876982 | JF694083 | JF694063 | JQ736736 |
| 119 | SPIROTRICHEA | Oligotrichia     | Strombidiida    | Strobilidiidae  | <i>Pelagostrobilidium minutum</i>       | Lab of Protozoology | FJ876959 | KM222055 | KM222149 | KM221991 |
| 120 | SPIROTRICHEA | Oligotrichia     | Strombidiida    | Strobilidiidae  | <i>Rimostrobilidium veniliae</i>        | Lab of Protozoology | FJ876964 | KM222056 | KM222150 | KM221993 |
| 121 | SPIROTRICHEA | Oligotrichia     | Strombidiida    | Strobilidiidae  | <i>Spirostrobilidium schizostomum</i>   | Lab of Protozoology | KM222098 | KM222053 | KM222147 | KM222000 |
| 122 | SPIROTRICHEA | Oligotrichia     | Strombidiida    | Strobilidiidae  | <i>Strombidium styliifer</i>            | Lab of Protozoology | JX012185 | JN853794 | KJ609058 | KM221999 |
| 123 | SPIROTRICHEA | Oligotrichia     | Strombidiida    | Tontoniidae     | <i>Pseudotontonia simplicidens</i>      | Lab of Protozoology | FJ422993 | KM222052 | KM222146 | KM221997 |
| 124 | SPIROTRICHEA | Phacodiniida     | Phacodiniida    | Phacodiniidae   | <i>Phacodinium metchnikoffi</i>         | GenBank             | AJ277877 | NA       | HM122023 | AY554040 |
| 125 | SPIROTRICHEA | Protohypotrichia | Kiitrichida     | Kiitrichidae    | <i>Caryotricha minuta</i>               | Lab of Protozoology | EU275202 | KM222036 | KM222125 | KM222026 |
| 126 | SPIROTRICHEA | Protohypotrichia | Kiitrichida     | Kiitrichidae    | <i>Kiitrichia marina</i>                | Lab of Protozoology | AY896768 | NA       | NA       | NA       |
| 127 | SPIROTRICHEA | Stichotrichia    | Sporadotrichida | Halteriidae     | <i>Halteria grandinella</i>             | GenBank             | AF508759 | AF508759 | AF508759 | AY041120 |
| 128 | SPIROTRICHEA | Stichotrichia    | Sporadotrichida | Halteriidae     | <i>Meseres corlissi</i>                 | GenBank             | EU399527 | EU399527 | EU399527 | NA       |
| 129 | SPIROTRICHEA | Stichotrichia    | Sporadotrichida | Oxytrichidae    | <i>Hemigastrostyla enigmatica</i>       | Lab of Protozoology | FJ870096 | KM222035 | KM222124 | KM222027 |
| 130 | SPIROTRICHEA | Stichotrichia    | Sporadotrichida | Oxytrichidae    | <i>Oxytricha granulifera</i>            | GenBank             | AF508762 | AF508762 | AF508762 | Z11763   |
| 131 | SPIROTRICHEA | Stichotrichia    | Sporadotrichida | Oxytrichidae    | <i>Tachysoma pellationellum</i>         | Lab of Protozoology | KM222096 | KM222045 | KM222137 | KM222015 |
| 132 | SPIROTRICHEA | Stichotrichia    | Sporadotrichida | Oxytrichidae    | <i>Tetmemena puslata</i>                | Lab of Protozoology | KM222092 | KM222037 | KM222126 | KM222018 |

|     |              |               |                 |                    |                                     |                     |          |          |          |              |
|-----|--------------|---------------|-----------------|--------------------|-------------------------------------|---------------------|----------|----------|----------|--------------|
| 133 | SPIROTRICHEA | Stichotrichia | Sporadotrichida | Trachelostylidae   | <i>Trachelostyla pediculiformis</i> | Lab of Protozoology | DQ057346 | KM222038 | KM222127 | KM222017     |
| 134 | SPIROTRICHEA | Stichotrichia | Stichotrichida  | Amphisiellidae     | <i>Amphisiella annulata</i>         | Lab of Protozoology | DQ832260 | KM222043 | KM222135 | KM222014     |
| 135 | SPIROTRICHEA | Stichotrichia | Stichotrichida  | Amphisiellidae     | <i>Paracladotricha salina</i>       | Lab of Protozoology | FJ870085 | KM222033 | KM222121 | KM222010     |
| 136 | SPIROTRICHEA | Stichotrichia | Stichotrichida  | Amphisiellidae     | <i>Uroleptoides qingdaoensis</i>    | Lab of Protozoology | KM222091 | KM222032 | KM222120 | KM221971     |
| 137 | SPIROTRICHEA | Stichotrichia | Stichotrichida  | Kahliellidae       | <i>Pseudokahliella marina</i>       | Lab of Protozoology | KM222095 | KM222041 | KM222133 | KM222019     |
| 138 | SPIROTRICHEA | Stichotrichia | Stichotrichida  | Plagiotomidae      | <i>Plagiotoma lumbrici</i>          | GenBank             | AY547545 | NA       | NA       | NA           |
| 139 | SPIROTRICHEA | Stichotrichia | Stichotrichida  | Spirofilidae       | <i>Strongylidium orientale</i>      | Lab of Protozoology | KC153532 | KM222034 | KM222122 | KM221972     |
| 140 | SPIROTRICHEA | Stichotrichia | Urostylida      | Bergeriellidae     | <i>Bergeriella ovata</i>            | Lab of Protozoology | FJ754026 | GQ246479 | JQ424856 | GQ258113     |
| 141 | SPIROTRICHEA | Stichotrichia | Urostylida      | Epiclontidae       | <i>Epiclontes auricularis</i>       | Lab of Protozoology | FJ008721 | GQ246480 | KM222128 | GQ262001     |
| 142 | SPIROTRICHEA | Stichotrichia | Urostylida      | Pseudokeronopsidae | <i>Nothoholosticha fasciola</i>     | Lab of Protozoology | FJ377548 | FJ858212 | JQ424846 | KM222011     |
| 143 | SPIROTRICHEA | Stichotrichia | Urostylida      | Pseudokeronopsidae | <i>Pseudokeronopsis flava</i>       | Lab of Protozoology | DQ227798 | DQ503579 | JQ424835 | KM221973     |
| 144 | SPIROTRICHEA | Stichotrichia | Urostylida      | Pseudokeronopsidae | <i>Thigmokeronopsis stoecki</i>     | Lab of Protozoology | EU220226 | GQ246485 | JQ424844 | EU678915     |
| 145 | SPIROTRICHEA | Stichotrichia | Urostylida      | Pseudokeronopsidae | <i>Uroleptopsis citrina</i>         | Lab of Protozoology | FJ870094 | JQ424858 | JQ424850 | KM222013     |
| 146 | SPIROTRICHEA | Stichotrichia | Urostylida      | Pseudourostylidae  | <i>Pseudourostyla sp.</i>           | Lab of Protozoology | FJ775725 | KM222042 | KM222134 | KM222016     |
| 147 | SPIROTRICHEA | Stichotrichia | Urostylida      | Urostylidae        | <i>Anteholosticha petzi</i>         | Lab of Protozoology | KM222093 | KM222039 | KM222130 | GQ258105     |
| 148 | SPIROTRICHEA | Stichotrichia | Urostylida      | Urostylidae        | <i>Apokeronopsis bergeri</i>        | Lab of Protozoology | DQ777742 | DQ777741 | JQ424840 | GQ258112     |
| 149 | SPIROTRICHEA | Stichotrichia | Urostylida      | Urostylidae        | <i>Holosticha diademata</i>         | Lab of Protozoology | DQ059583 | EU925647 | KM222131 | KM222009     |
| 150 | SPIROTRICHEA | Stichotrichia | Urostylida      | Urostylidae        | <i>Holosticha heterofoissneri</i>   | Lab of Protozoology | KM222094 | KM222040 | KM222132 | KM222012     |
| 151 | SPIROTRICHEA | Stichotrichia | Urostylida      | Urostylidae        | <i>Neurostylopsis flavicana</i>     | Lab of Protozoology | FJ775718 | JQ424869 | JQ424857 | KM222028     |
| 152 | SPIROTRICHEA | Stichotrichia | Urostylida      | Urostylidae        | <i>Parabirojimia multinucleata</i>  | Lab of Protozoology | FJ156104 | GQ246482 | KM222129 | GQ258108     |
| 153 | APICOMPLEXA  |               |                 |                    | <i>Theileria parva</i>              | GenBank             | L02366   | U03602   | AF013419 | XM_758635    |
| 154 | APICOMPLEXA  |               |                 |                    | <i>Eimeria tenella</i>              | GenBank             | AF026388 | AF026388 | AF026388 | HG675723     |
| 155 | APICOMPLEXA  |               |                 |                    | <i>Toxoplasma gondii</i>            | GenBank             | X75429   | X75429   | X75429   | XM_002364766 |
| 156 | DINOPHYCEAE  |               |                 |                    | <i>Perkinsus marinus</i>            | GenBank             | AF497479 | AF497479 | AF497479 | AF482399     |
| 157 | DINOPHYCEAE  |               |                 |                    | <i>Karenia brevis</i>               | GenBank             | EF492502 | FJ823562 | AY355459 | AF482419     |
| 158 | DINOPHYCEAE  |               |                 |                    | <i>Alexandrium tamarense</i>        | GenBank             | JF521639 | JF521639 | JF521639 | NA           |

## **Supporting information**

**Figure S1.** Maximum likelihood (ML) tree focusing on 113 ciliate representatives based on 5.8S rDNA sequences.

**Figure S2.** Bayesian inference (BI) tree focusing on 113 ciliate representatives based on 5.8S rDNA sequences.

**Figure S3.** Maximum likelihood (ML) tree focusing on 116 ciliate representatives based on alpha-tubulin amino acid sequences.

**Figure S4.** Bayesian inference (BI) tree focusing on 116 ciliate representatives based on alpha-tubulin amino acid sequences.

**Figure S5.** Maximum likelihood (ML) tree focusing on 116 ciliate representatives based on alpha-tubulin first two codon positions.

**Figure S6.** Bayesian inference (BI) tree focusing on 116 ciliate representatives based on alpha-tubulin first two codon positions.

Figure S1. Maximum likelihood (ML) tree focusing on 113 ciliate representatives based on 5.8S rDNA sequences.

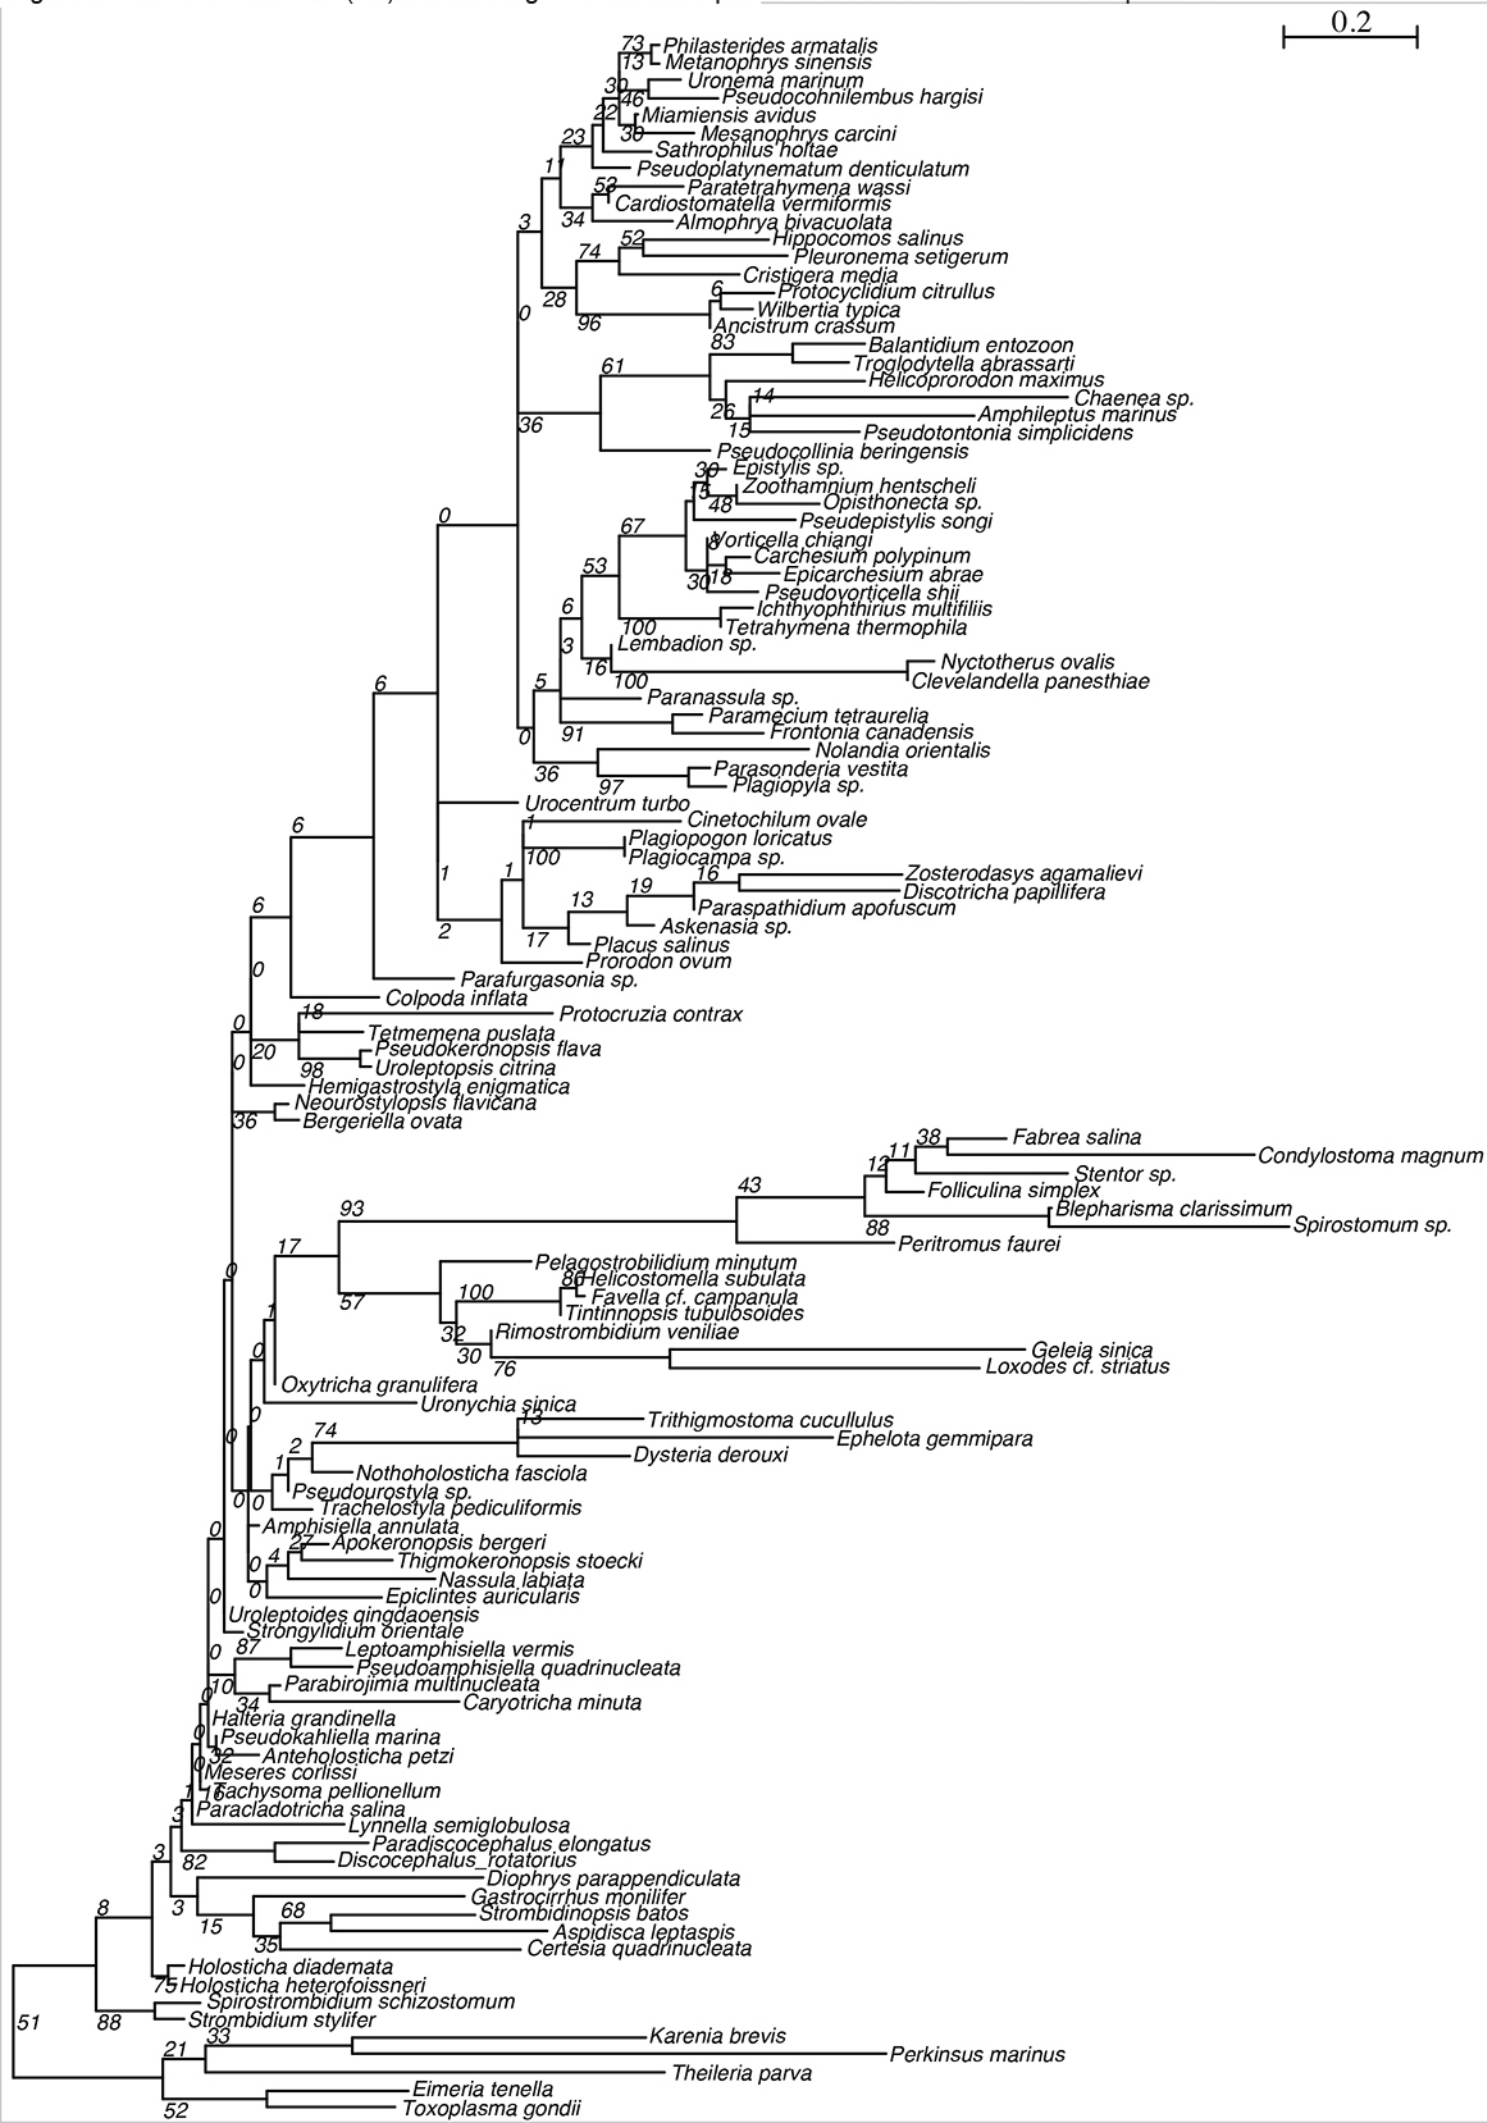



Figure S2. Bayesian inference (BI) tree focusing on 113 ciliate representatives based on 5.8S rDNA sequences.

0.1

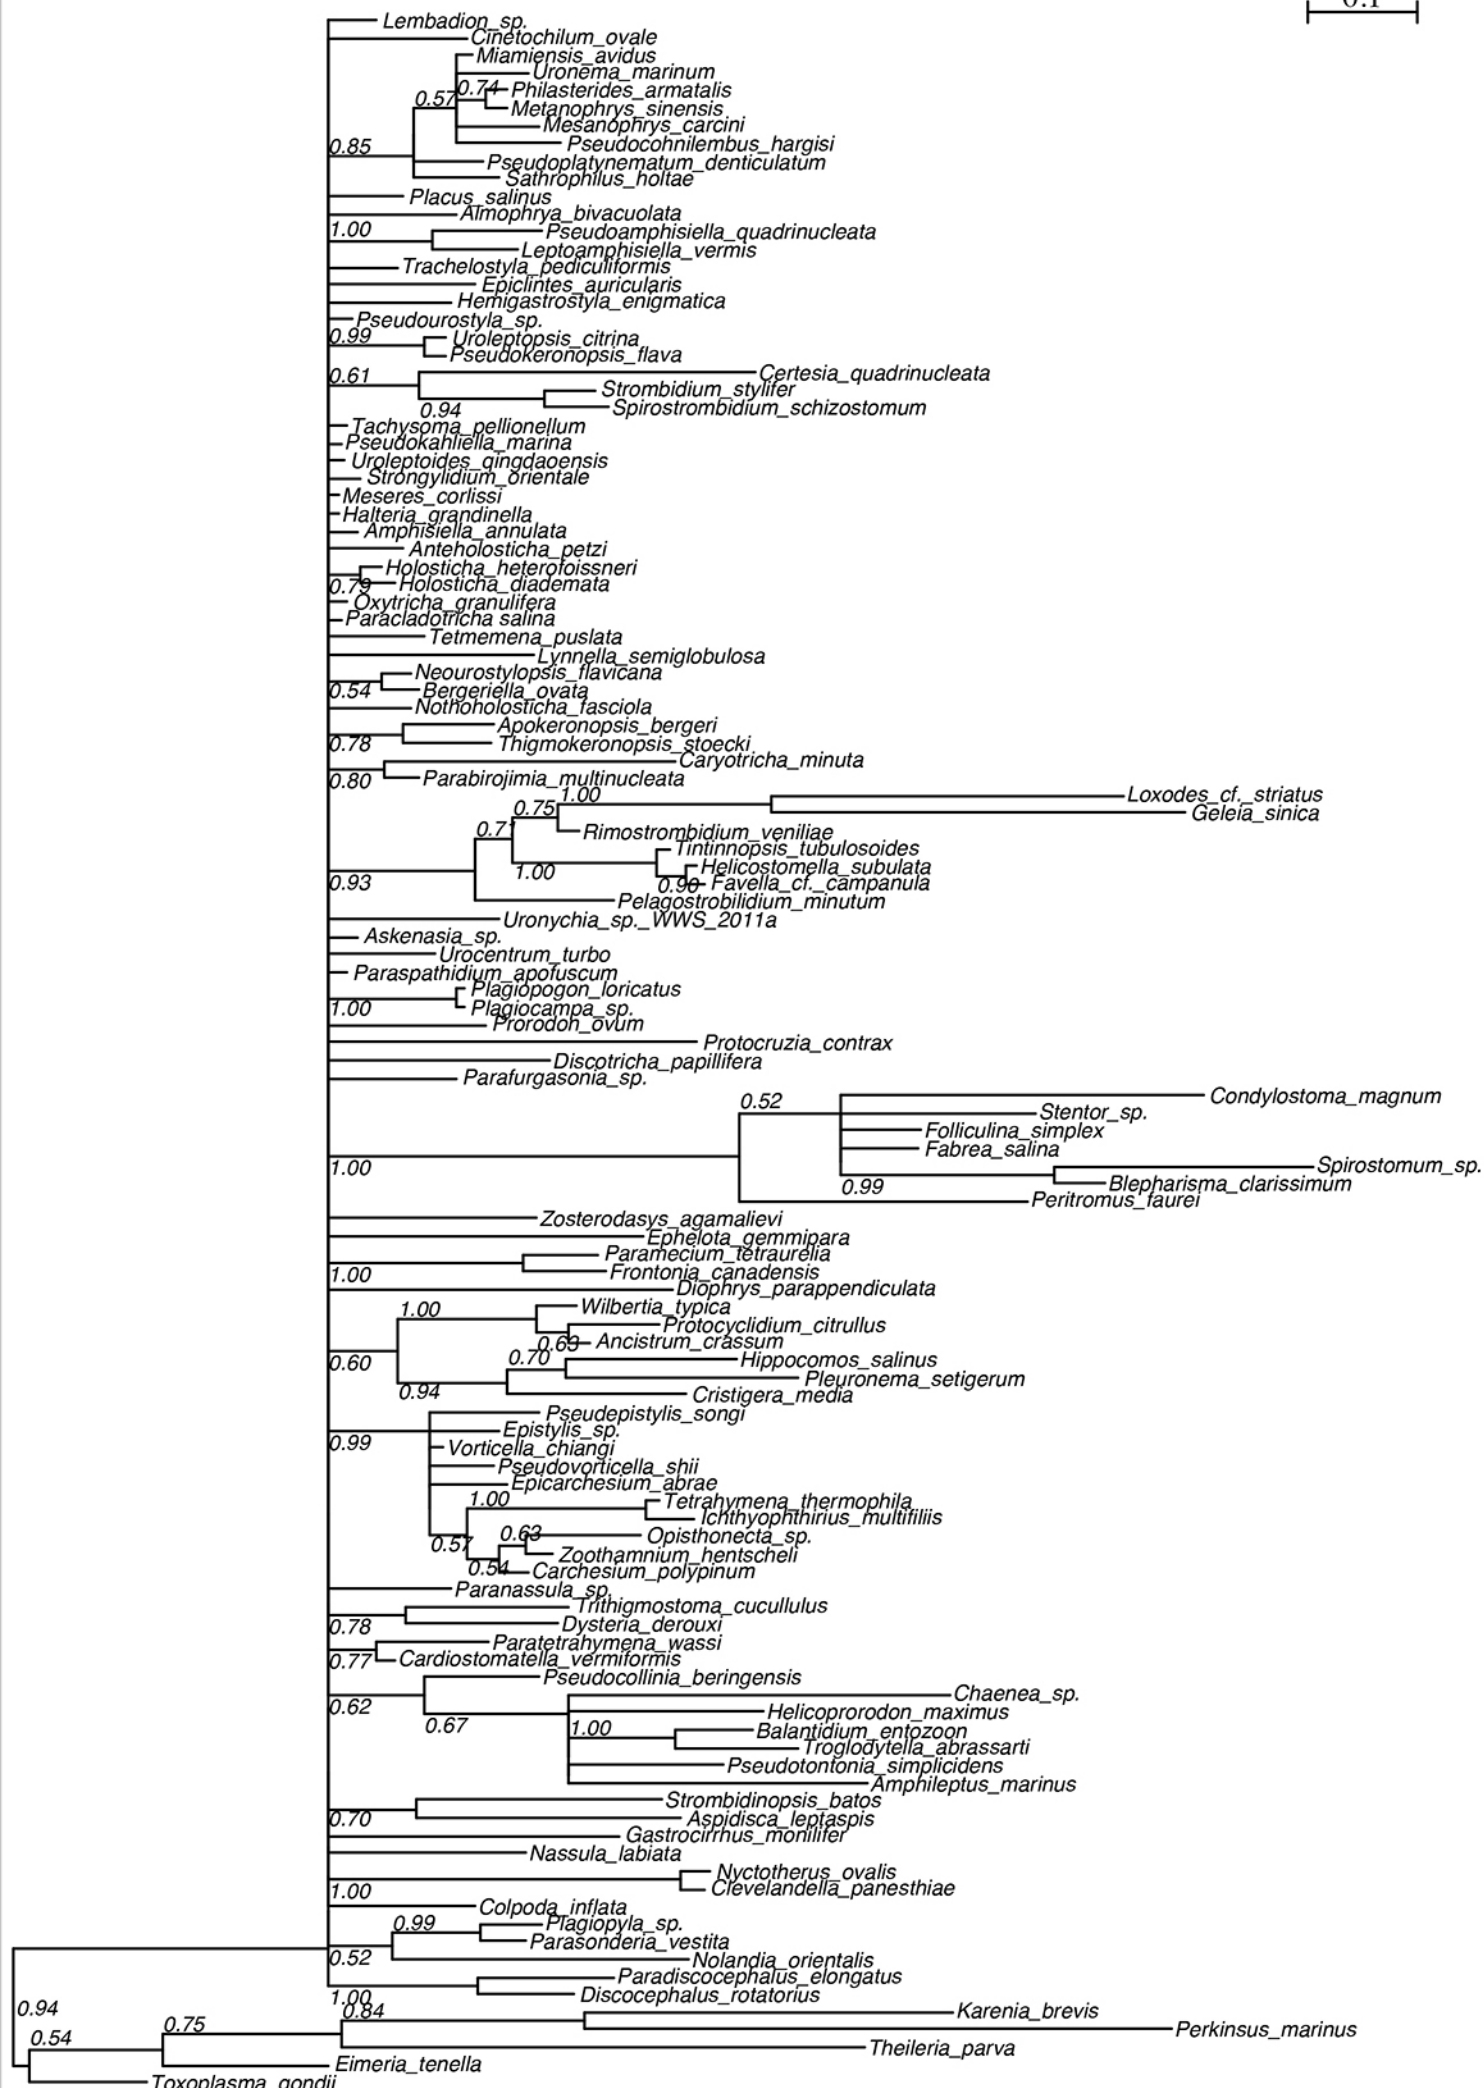

Figure S3. Maximum likelihood (ML) tree focusing on 116 ciliate representatives based on alpha-tubulin amino acid sequences.

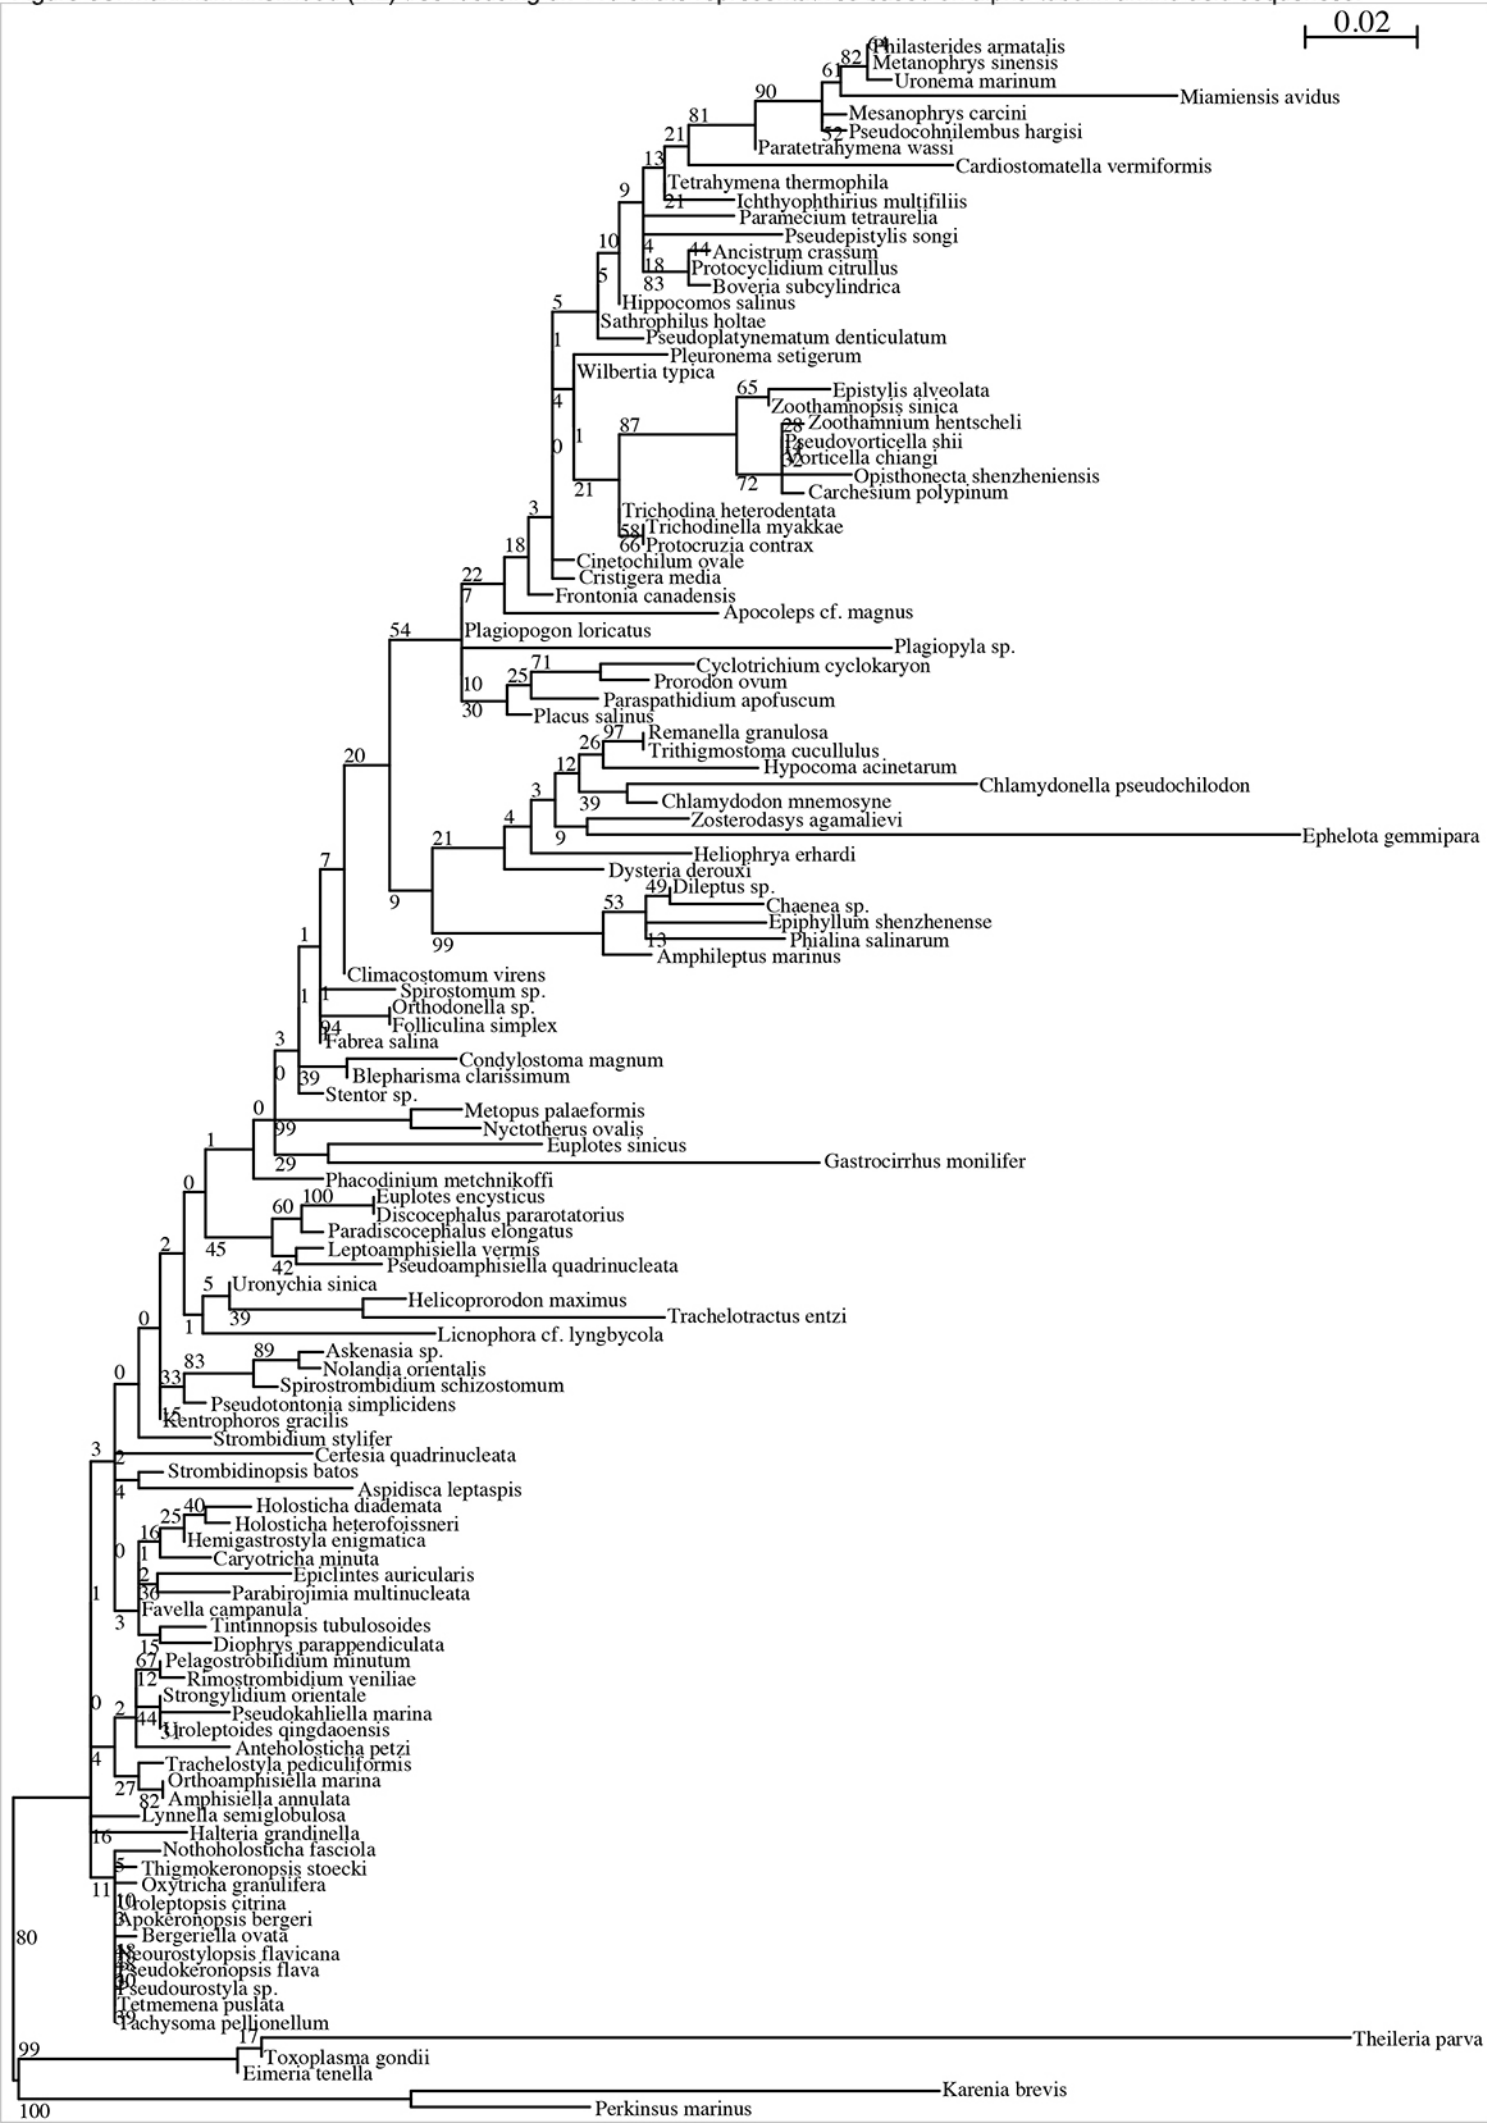

Figure S4. Bayesian inference (BI) tree focusing on 116 ciliate representatives based on alpha-tubulin amino acid sequences.

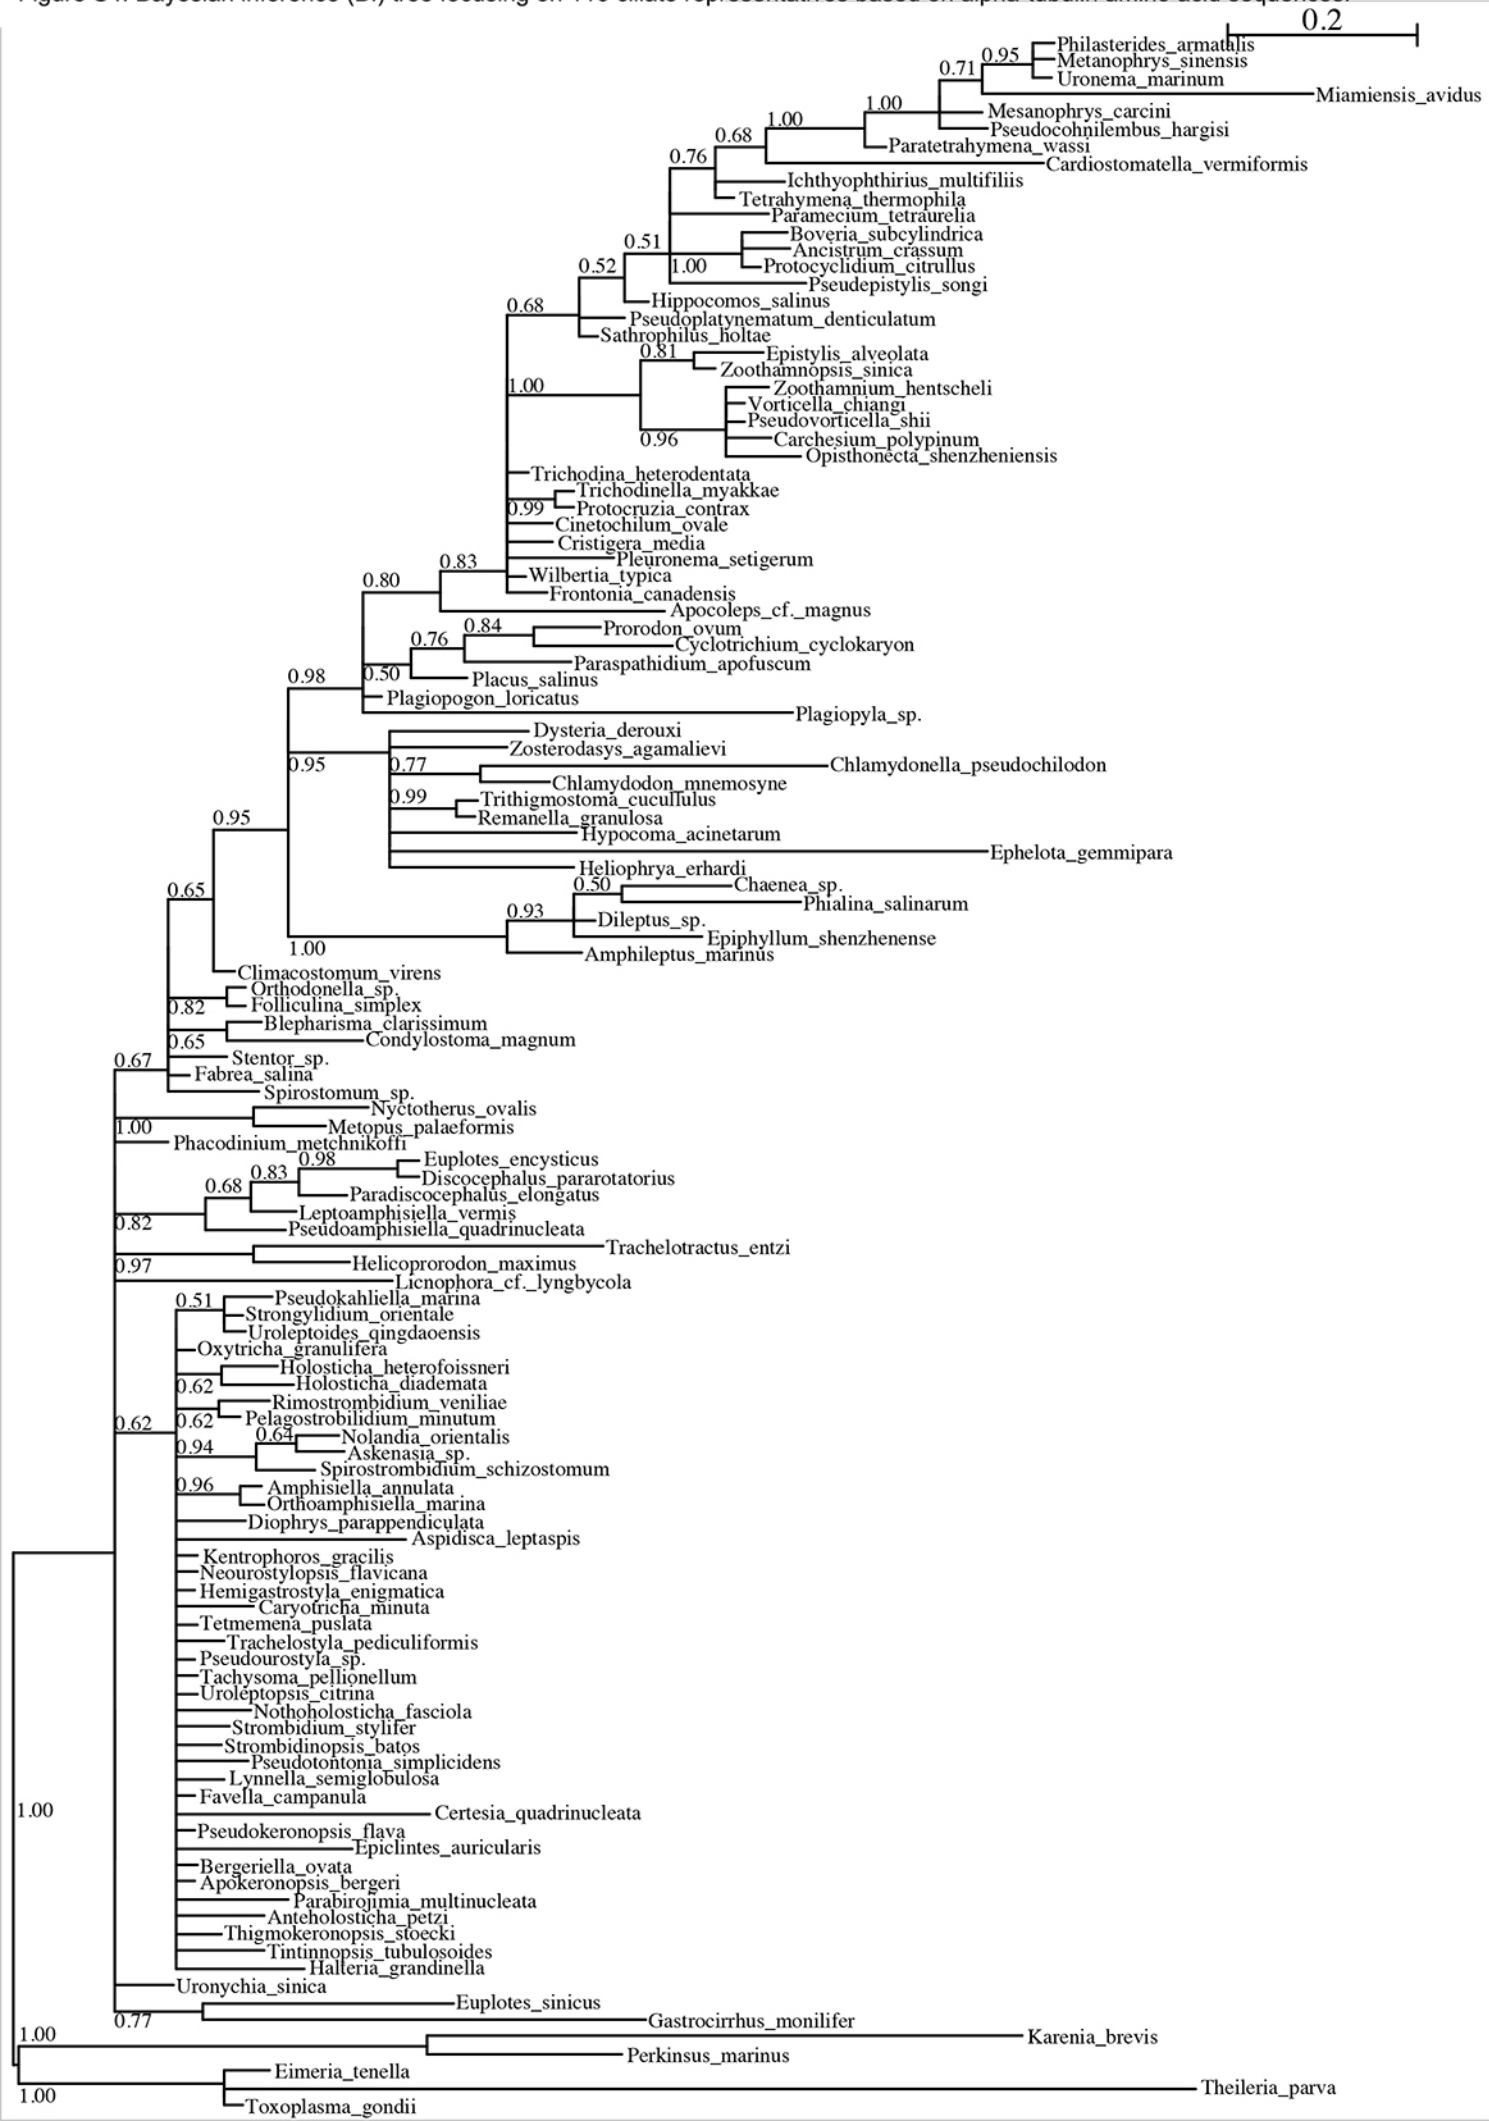

Figure S5. Maximum likelihood (ML) tree focusing on 116 ciliate representatives based on alpha-tubulin first two codon positions.

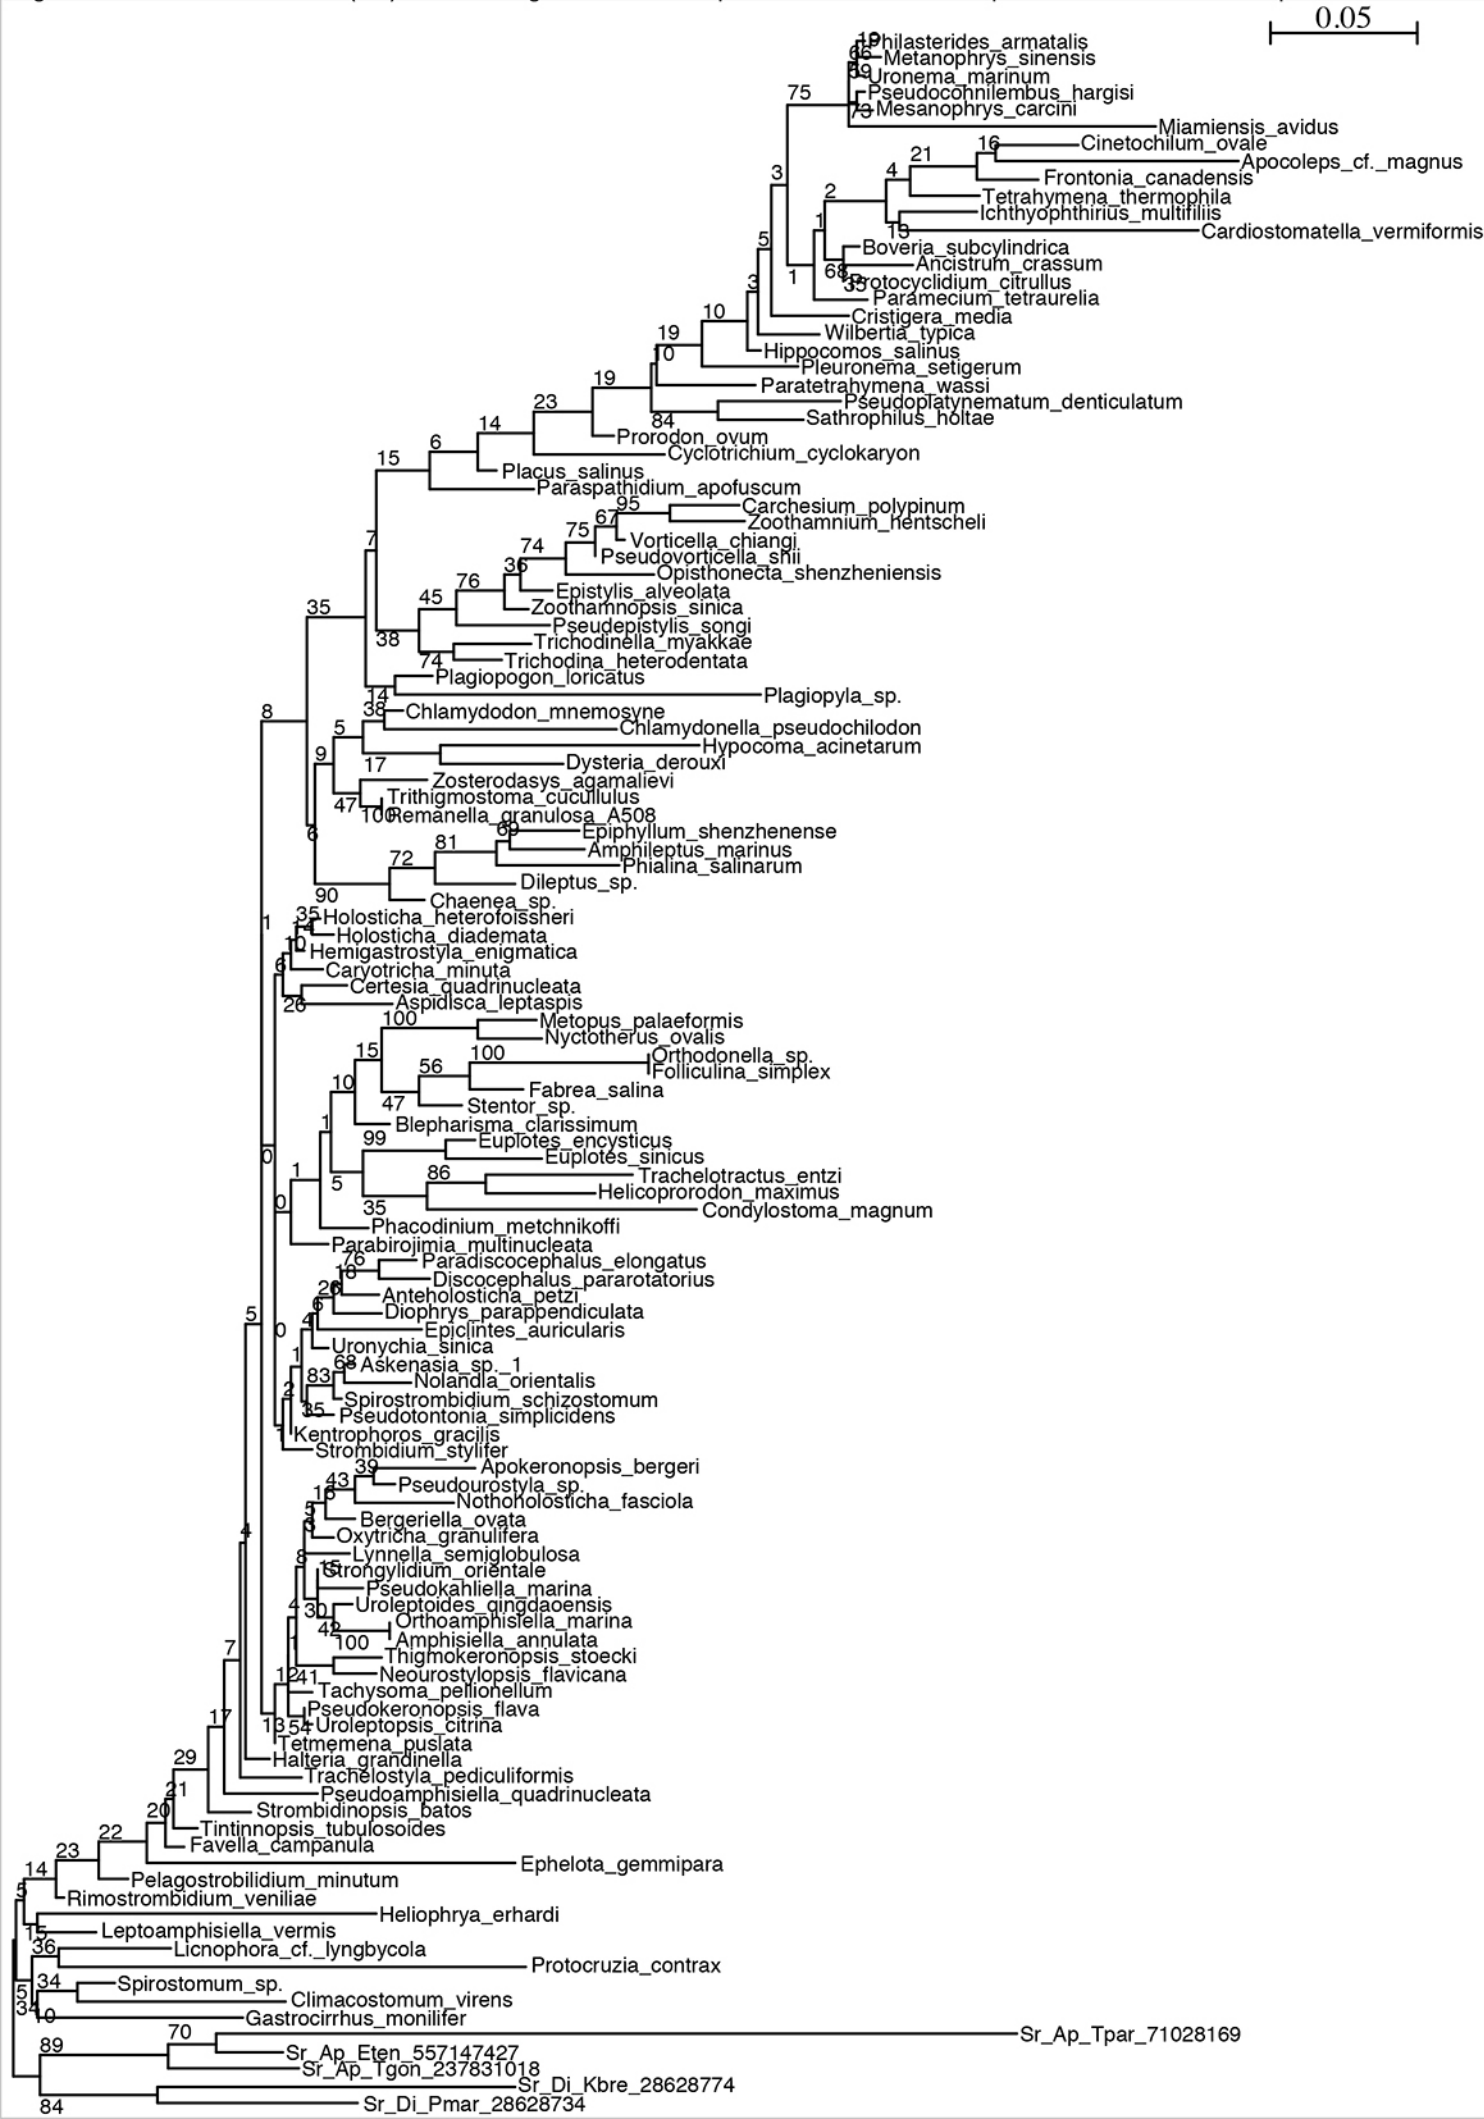

Figure S6. Bayesian inference (BI) tree focusing on 116 ciliate representatives based on alpha-tubulin first two codon positions

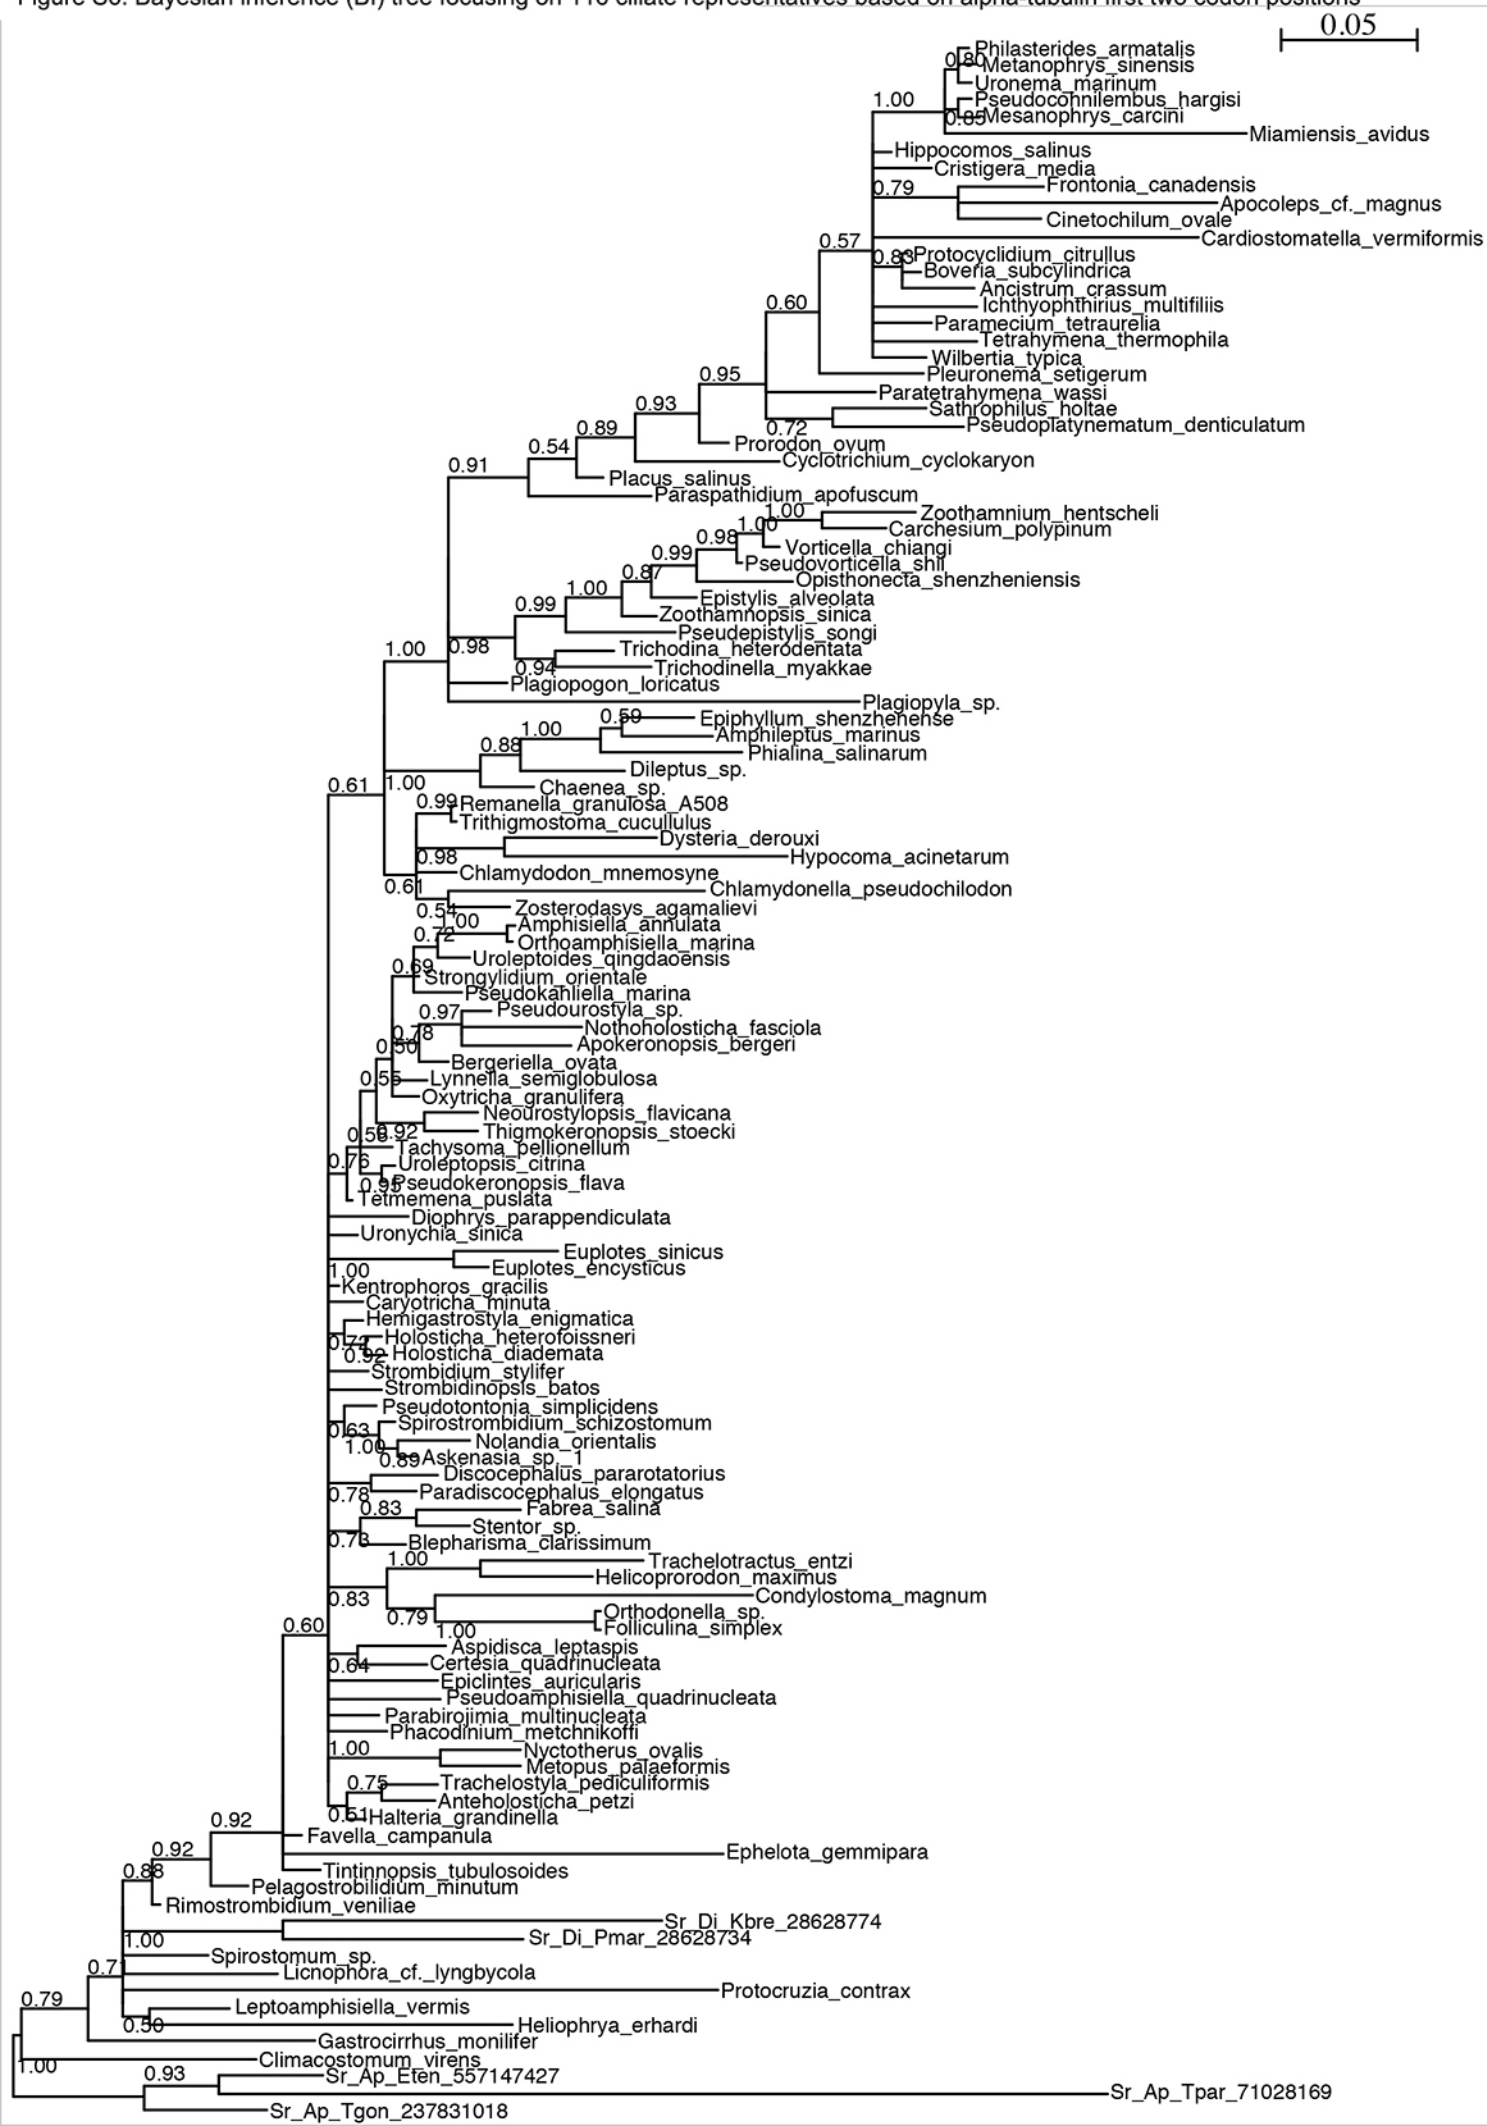

Supplement: 41598_2016_BFsrep24874_MOESM1_ESM.pdf [file 41598_2016_BFsrep24874_MOESM1_ESM.pdf]
